# Supplementary material for: Results of a randomized, double-blind phase II clinical trial of NY-ESO-1 vaccine with ISCOMATRIX adjuvant versus ISCOMATRIX alone in participants with high-risk resected melanoma
Source: PubMed Central journal article supplement — J Immunother Cancer. 2020 Apr 20;8(1):e000410. doi: 10.1136/jitc-2019-000410 (PMC7204806; doi:10.1136/jitc-2019-000410), 2020-04-20

**Figure S7.1**

**Patient information**  
 ID: 013-005;  
 Demographics: 32yo, F  
 HLA: A2,A3; B62,B37; Cw9,Cw6  
 Melanoma stage: IIIb; cutaneous  
 Relapse: D475  
 Completed vaccination: Yes  
 Reason: (if no)  
 No. Vaccine doses: 4

**Anti NY-ESO-1 Aby**

**CD8+ responses to viral peptide pool**

**Summary**  
 CD8 response: 15<sup>v</sup>  
 CD4 response: 15<sup>v</sup>, 21<sup>v</sup>, 27<sup>v</sup>  
 Antibody response: p

Examples of ICS  
 FACS plots

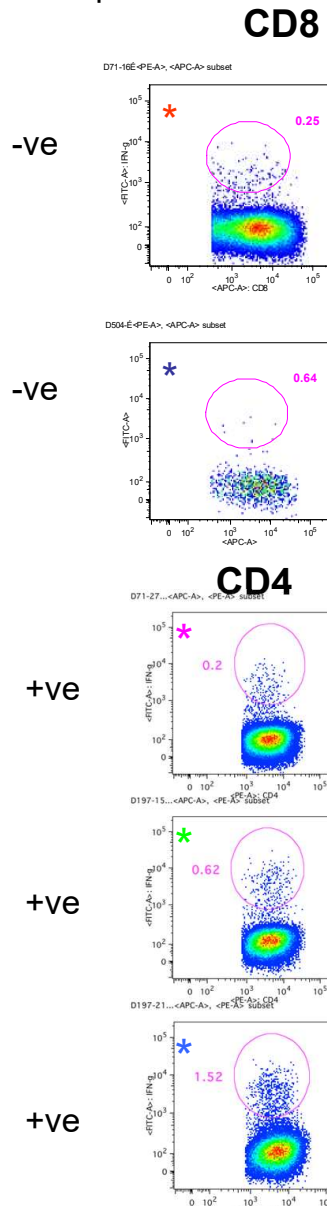

Overlapping NY-ESO-1 peptide ICS

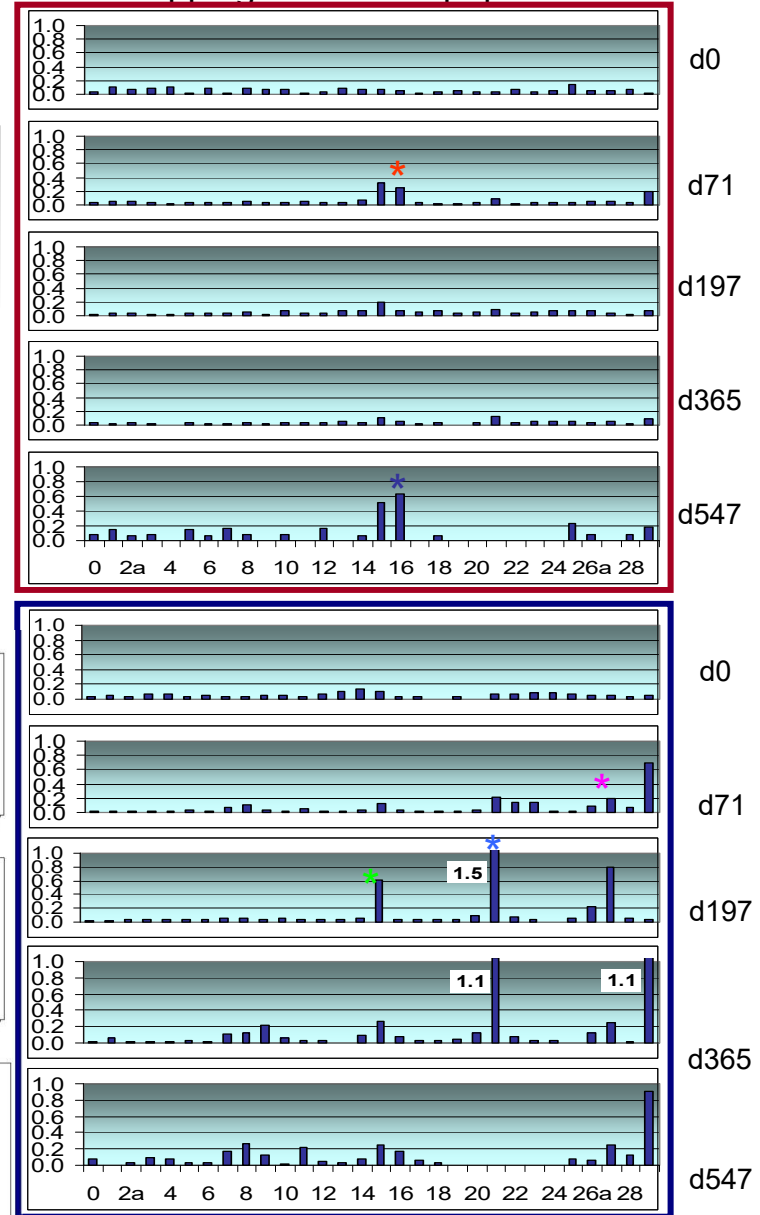

# Figure S7.2

## Patient information

ID: 013-008;  
 Demographics: 59yo, M  
 HLA: A1; B8; Cw7  
 Melanoma stage: IIIb; cutaneous  
 Relapse: No  
 Completed vaccination: Yes  
 Reason: (if no)  
 No. Vaccine doses: 4

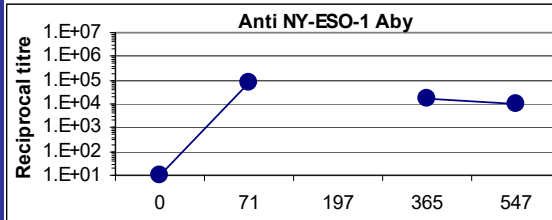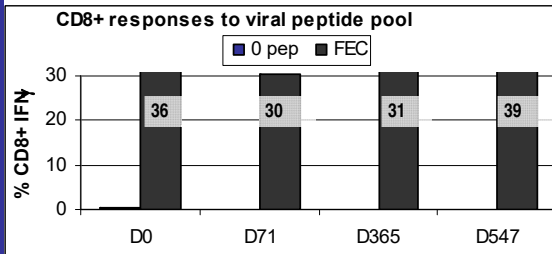

## Summary

CD8 response: nil  
 CD4 response: 14<sup>v</sup>, 15<sup>v</sup>, 18<sup>v</sup>, 19<sup>v</sup>, 20<sup>v</sup>, 21<sup>v</sup>  
 Antibody response: v

## Examples of ICS FACS plots

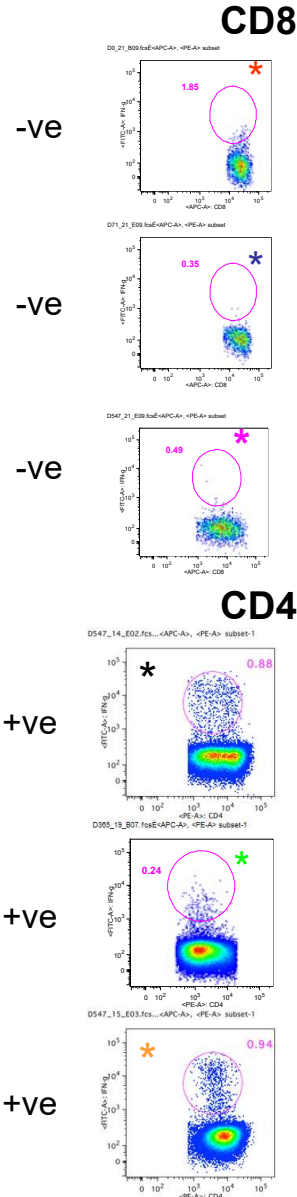

## Overlapping NY-ESO-1 peptide ICS

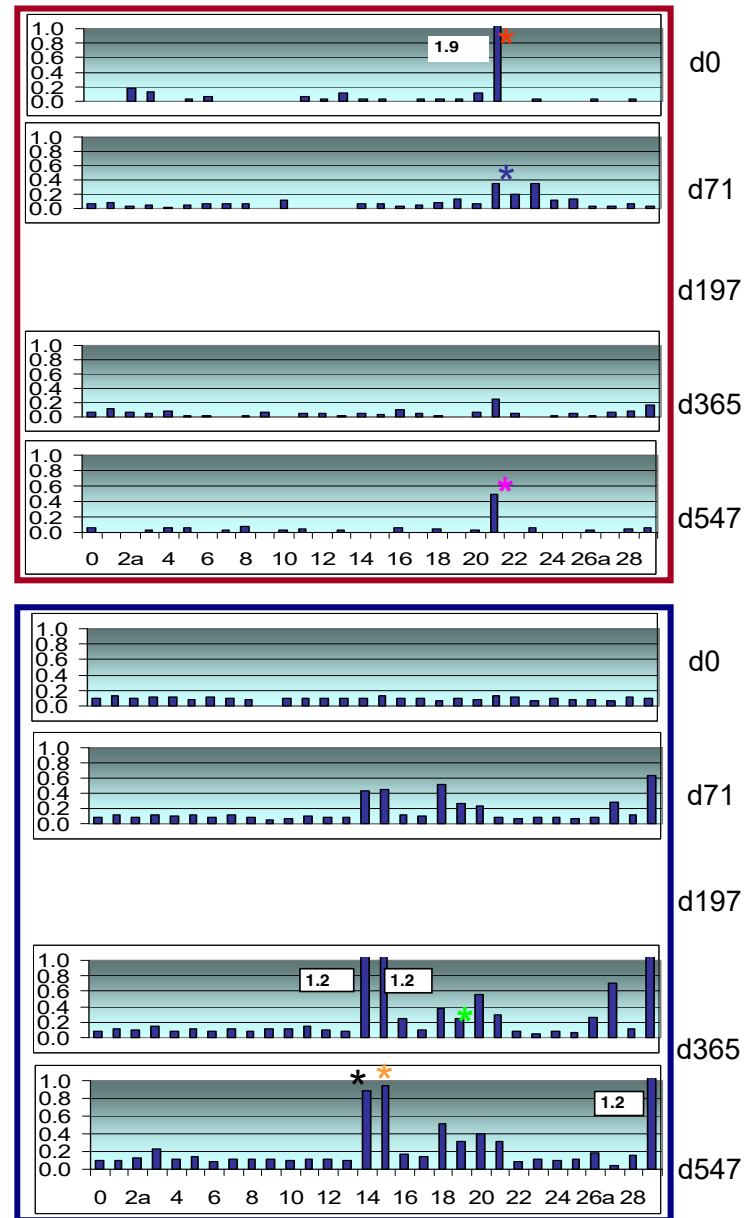

# Figure S7.3

## Patient information

ID: 013-009

Demographics: 44yo, M

HLA: A1, A2; B44; Cw5

Melanoma stage: IV; cutaneous

Relapse: No

Completed vaccination: Yes

Reason: (if no)

No. Vaccine doses: 4

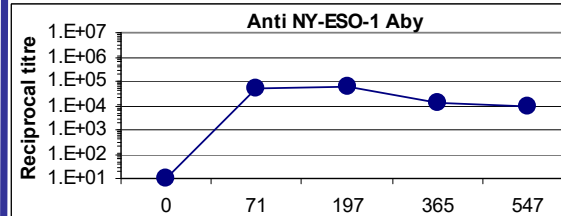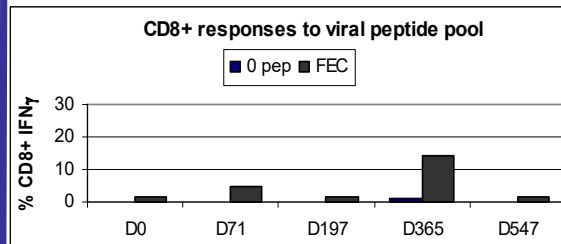

## Summary

CD8 response: nil

CD4 response: 21%

Antibody response: v

## Examples of ICS FACS plots

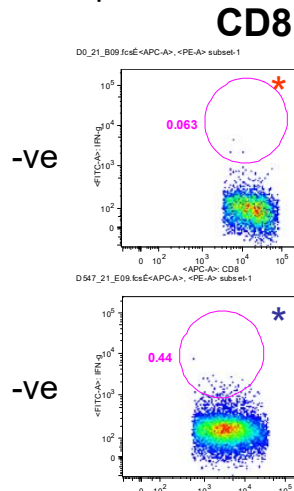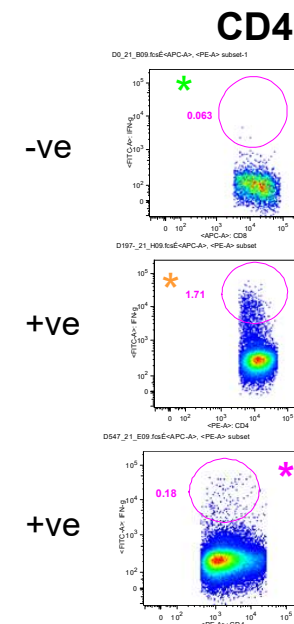

## Overlapping NY-ESO-1 peptide ICS

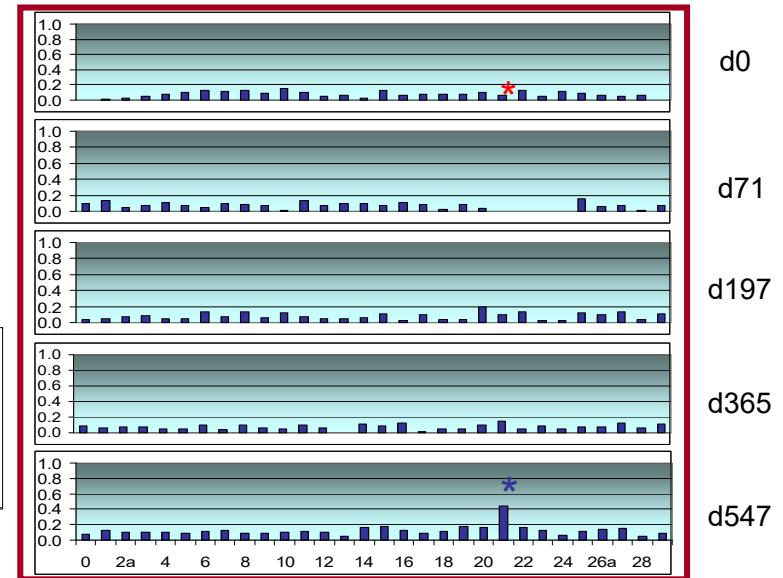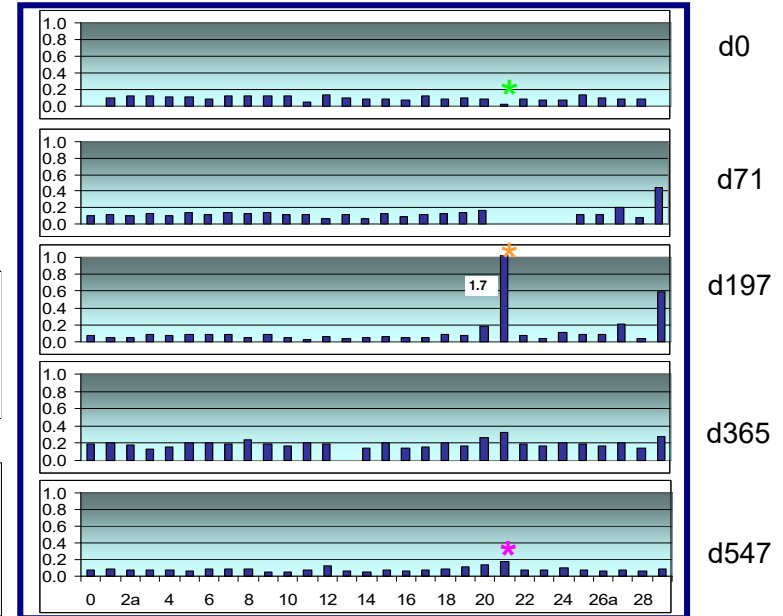

# Figure S7.4

## Patient information

ID: 013-010

Demographics: 53yo, F

HLA: A1, A2; B7, B18; Cw7, Cw7

Melanoma stage: IIIb; cutaneous

Relapse: No

Completed vaccination: Yes

Reason: (if no)

No. Vaccine doses: 4

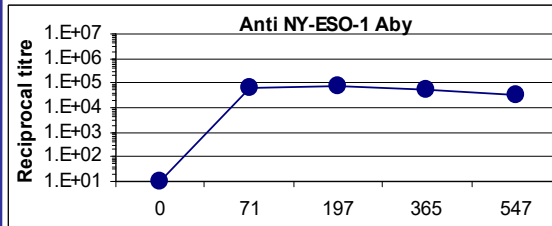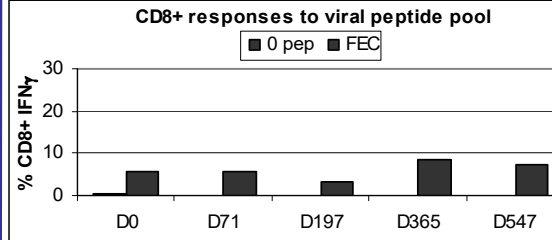

## Summary

CD8 response: 15<sup>p</sup>

CD4 response: 14v, 15v, 17v, 21v, 23<sup>p</sup>

Antibody response: v

## Examples of ICS FACS plots

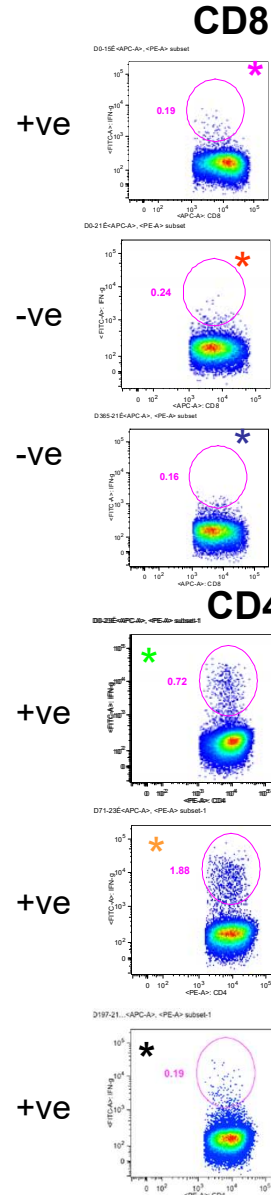

## Overlapping NY-ESO-1 peptide ICS

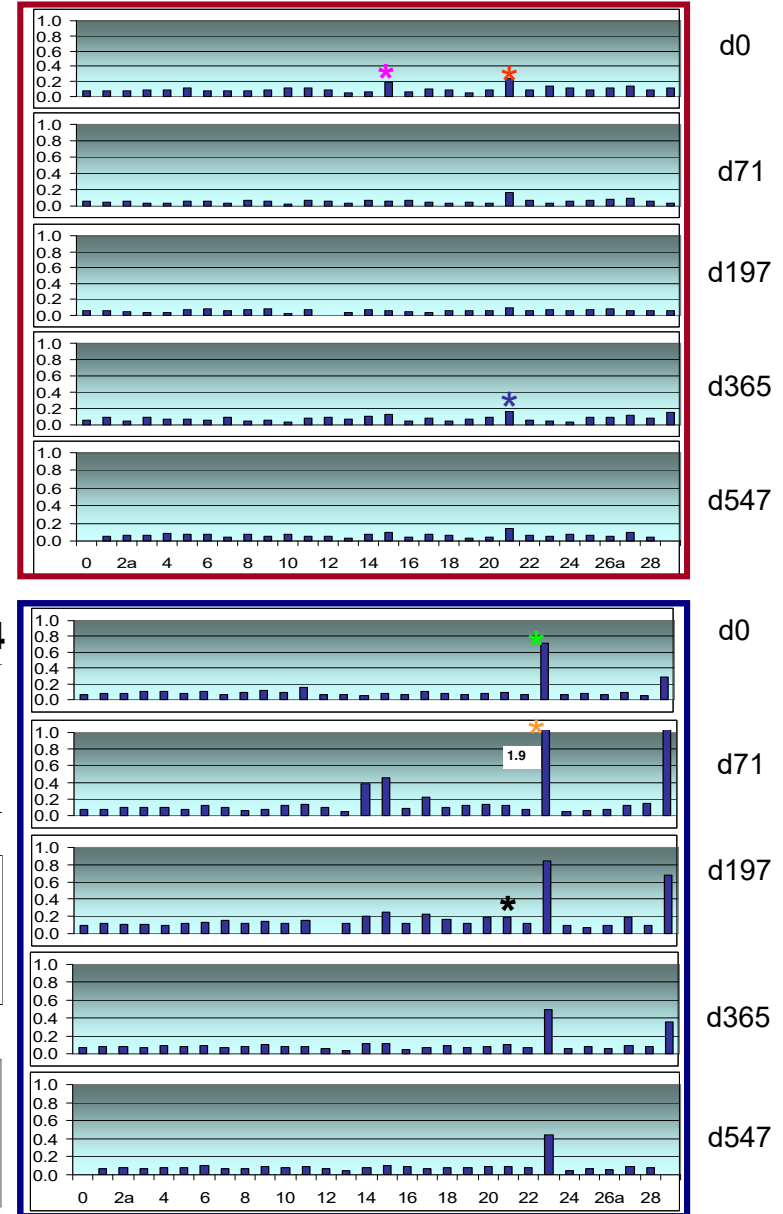

# Figure S7.5

## Patient information

ID: 013-015  
 Demographics: 42yo, M  
 HLA: A2; B7; Cw7  
 Melanoma stage: IIIb; cutaneous  
 Relapse: Yes  
 Completed vaccination: Yes  
 Reason: PD D226  
 No. Vaccine doses: 4  
 Comments: Relapse in previous LN excision site

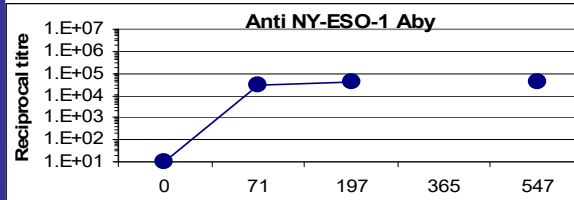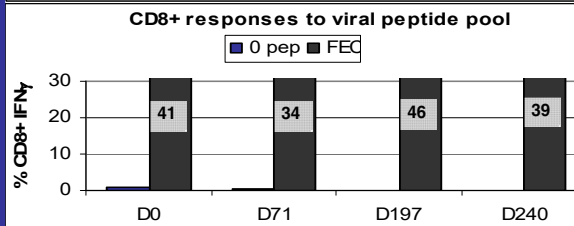

## Summary

CD8 response: 2<sup>p</sup>, 15<sup>p</sup> lost post vacc  
 CD4 response: 14<sup>v</sup>, 15<sup>v</sup>, 20<sup>v</sup>, 21<sup>v</sup>  
 Antibody response: v

## Examples of ICS FACS plots

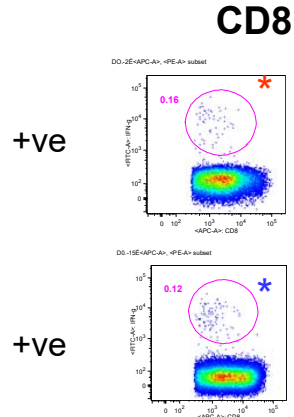

+ve

+ve

## CD8

## CD4

+ve

+ve

## Overlapping NY-ESO-1 peptide ICS

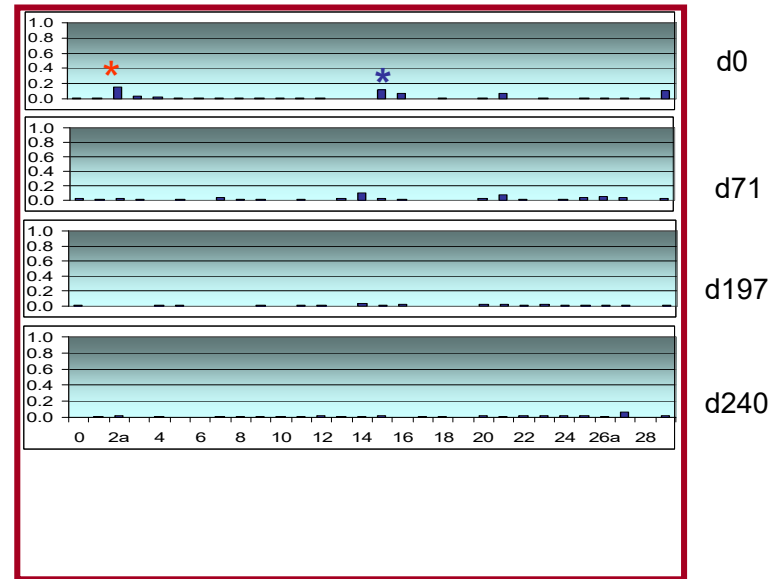

d0

d71

d197

d240

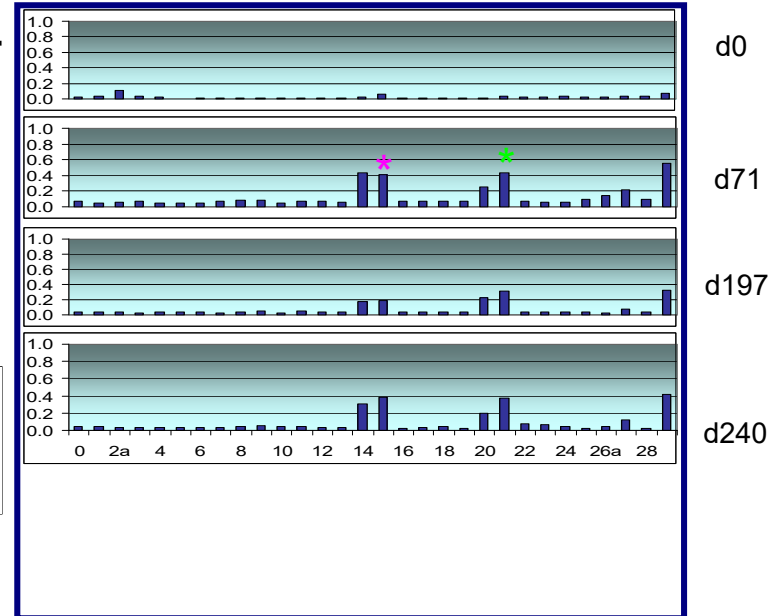

d0

d71

d197

d240

# Figure S7.6

**Patient information**  
 ID: 014-004  
 Demographics: 52yo, F  
 HLA: A9201; B27, B8; Cw2, Cw3  
 Melanoma stage: IV;  
 Relapse: D546 (EOS)  
 Completed vaccination: Yes  
 No. Vaccine doses: 4

**Anti NY-ESO-1 Aby**

**CD8+ responses to viral peptide pool**

**Summary**  
 CD8 response: nil  
 CD4 response: 15<sup>v</sup>, 16<sup>v</sup>, 17<sup>v</sup>, 18<sup>v</sup>, 19<sup>v</sup>, 21<sup>v</sup>  
 Antibody response: p

## Examples of ICS FACS plots

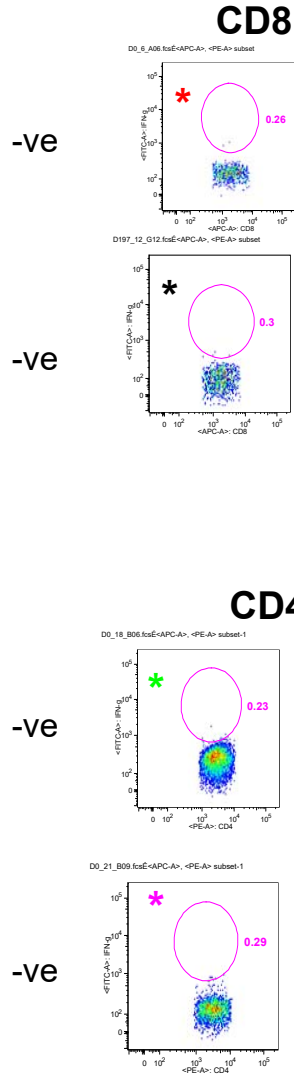

## Overlapping NY-ESO-1 peptide ICS

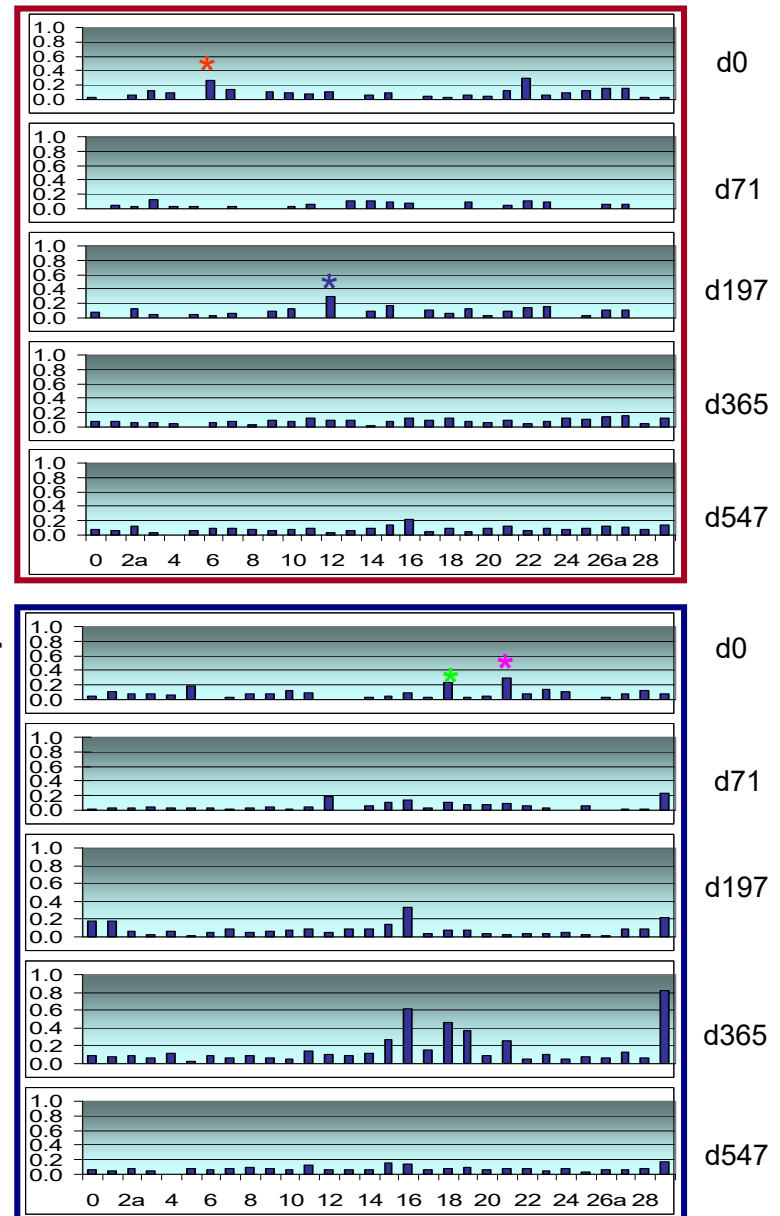

# Figure S7.7

## Patient information

ID: 014-009

Demographics: 74yo, M

HLA: A3, A29; B44

Melanoma stage:IIIb

Relapse: No

Completed vaccination: Yes

Reason: (if no)

No. Vaccine doses: 4

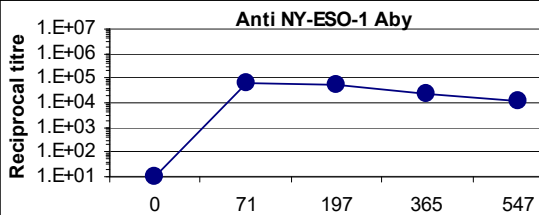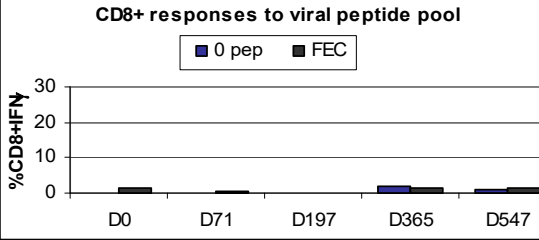

## Summary

CD8 response: Nil. High background

background

CD4 response: 14%, 20%, 21%

Antibody response: v

## Examples of ICS FACS plots

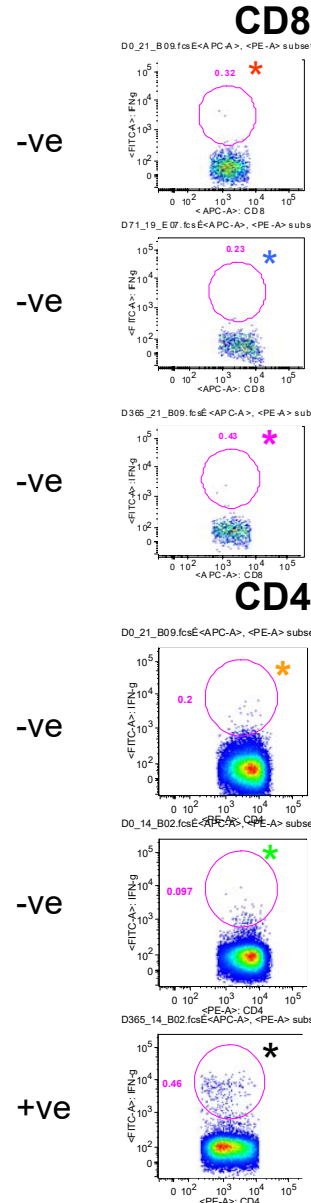

## Overlapping NY-ESO-1 peptide ICS

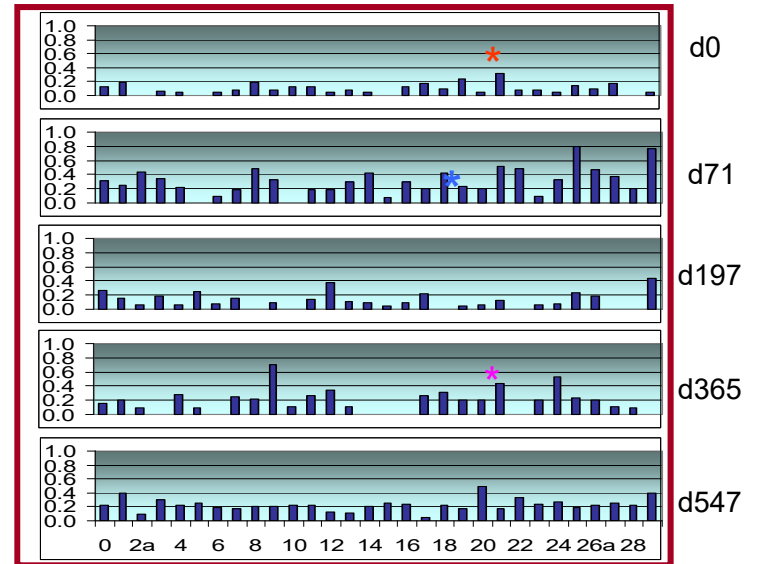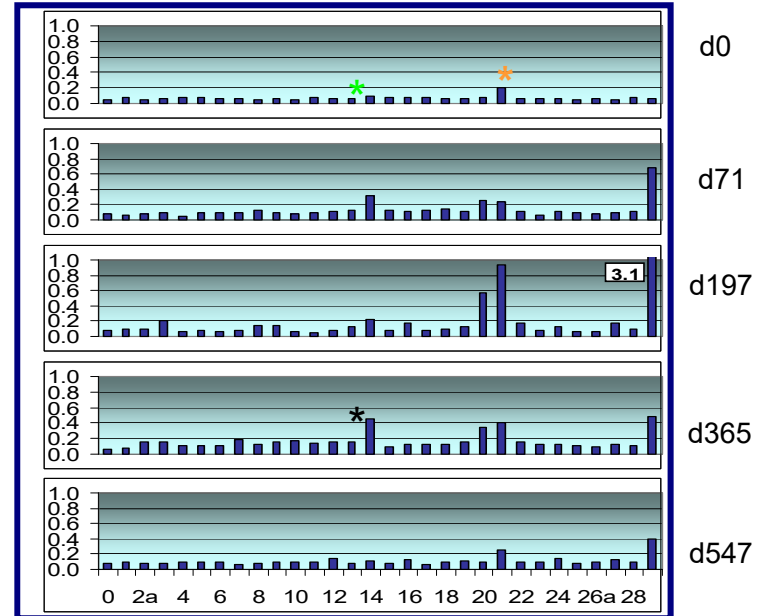

# Figure S7.8

## Patient information

ID: 014-010;  
 Demographics: 32yo, M  
 HLA: A2, A11; B51; Cw4  
 Melanoma stage: IV  
 Relapse: No  
 Completed vaccination: Yes  
 Reason: (if no)  
 No. Vaccine doses: 4

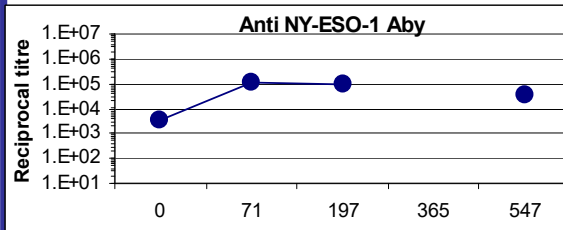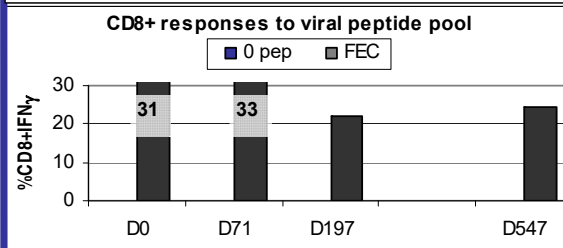

## Summary

CD8 response: 15<sup>p</sup>, 16<sup>p</sup>  
 CD4 response: 15<sup>p</sup>  
 Antibody response: p

## Examples of ICS FACS plots

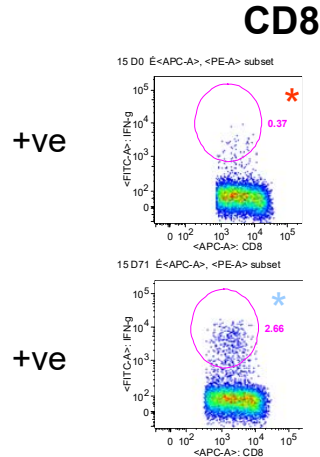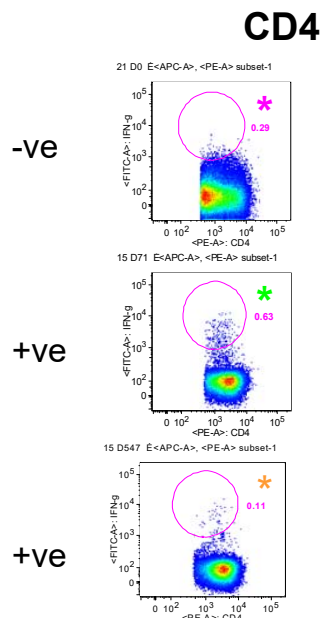

## Overlapping NY-ESO-1 peptide ICS

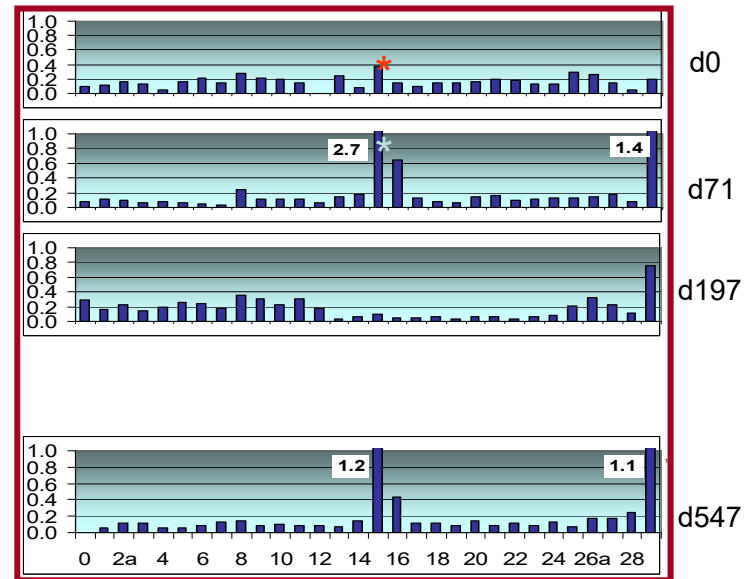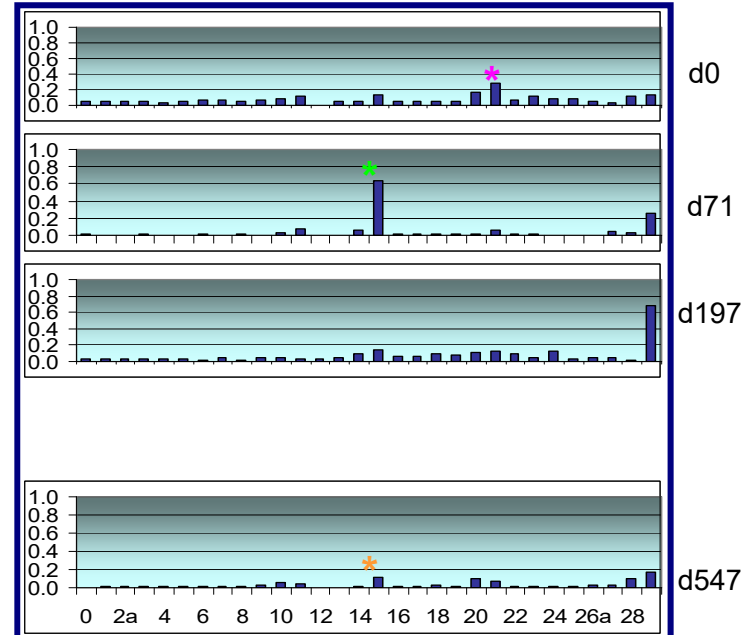



# Figure S7.9

## Patient information

ID: 014-013  
 Demographics: 74yo,M  
 HLA:A24,A30; B7,B18; Cw5,Cw7  
 Melanoma stage: IIIc;  
 Relapse: Yes  
 Completed vaccination: No  
 Reason: PD D99  
 No. Vaccine doses: 3

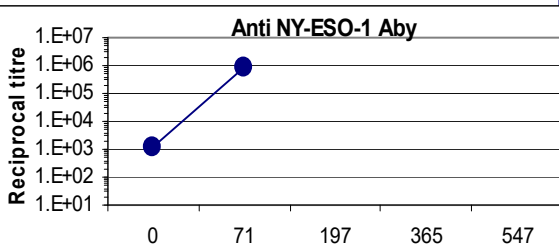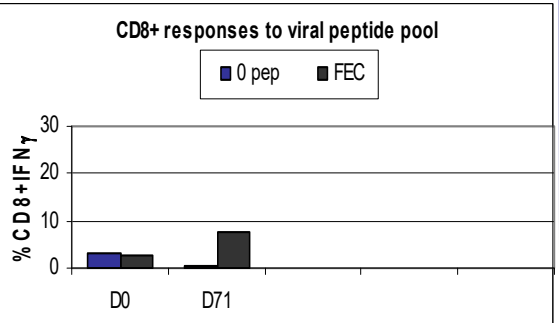

## Summary

CD8 response: 12<sup>v</sup>, 19<sup>v</sup>, 23<sup>v</sup>, 24<sup>v</sup>  
 CD4 response: 20<sup>p</sup>, 21<sup>p</sup>  
 Antibody response: p

## Examples of ICS FACS plots

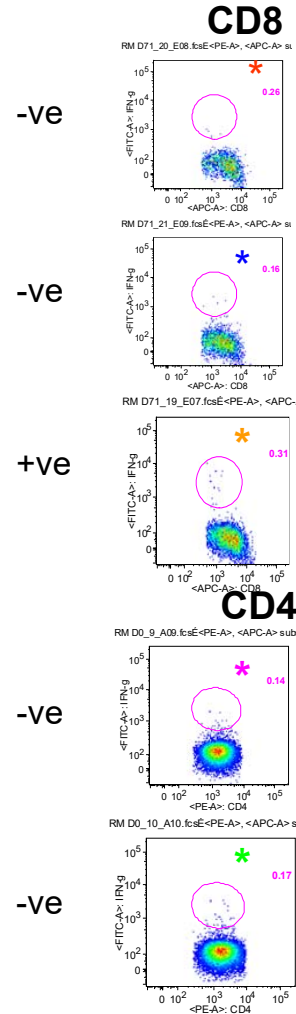

## Overlapping NY-ESO-1 peptide ICS

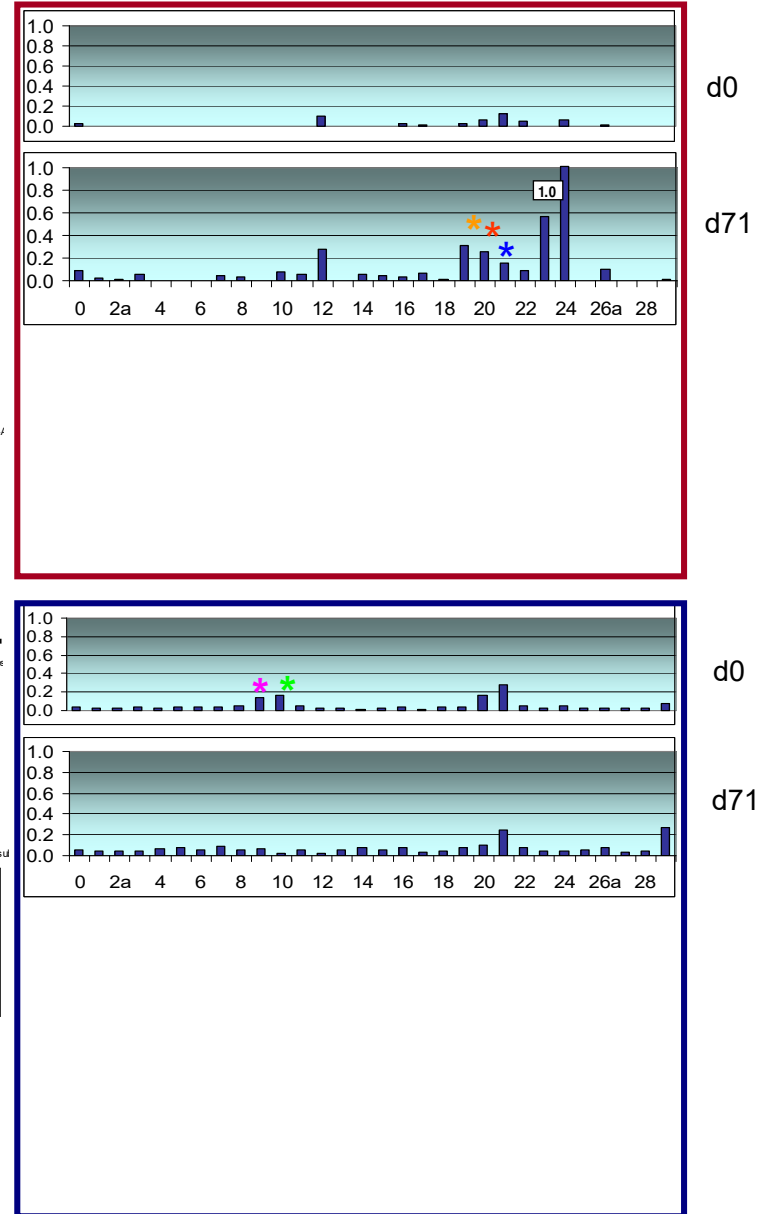

**Figure S7.10**

**Patient information**

ID: 062-005

Demographics: 50yo, M

HLA: A2; B15, B27;

Melanoma stage: IIIb

Relapse: No

Completed vaccination: Yes

Reason: (if no)

No. Vaccine doses: 4

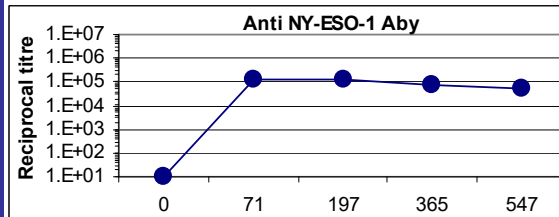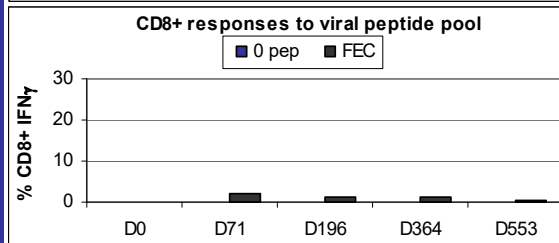

**Summary**

CD8 response: 21v, 26v

CD4 response: 21v, 26v

Antibody response: v

Examples of ICS FACS plots

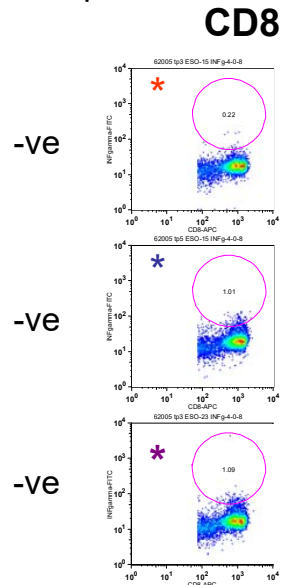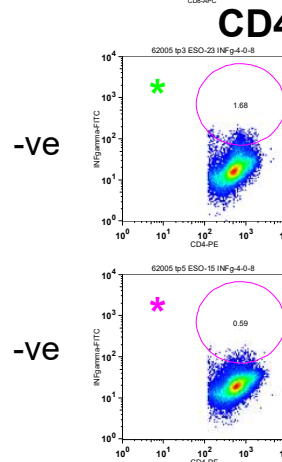

Overlapping NY-ESO-1 peptide ICS

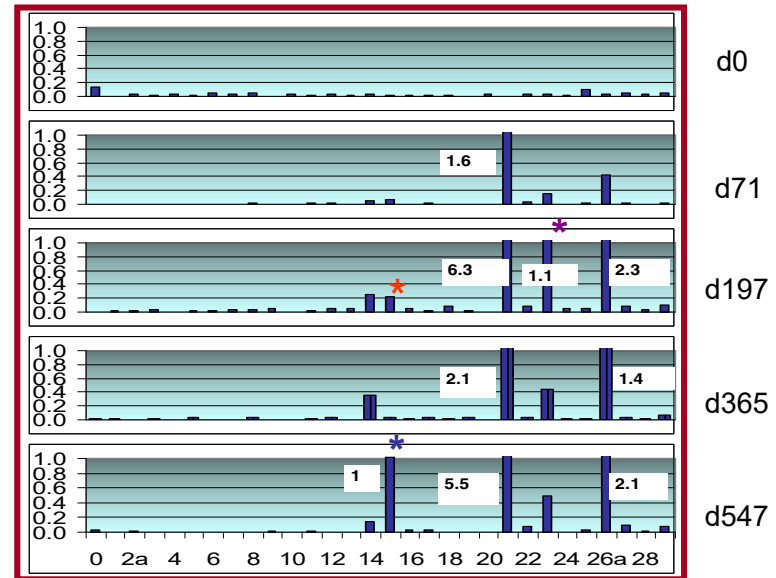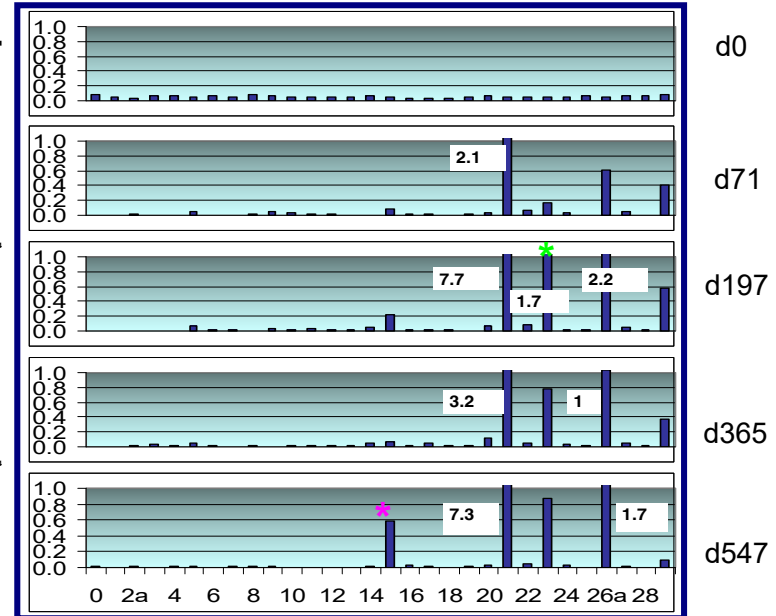

**Figure S7.11**

Patient information

ID: 062-006

Demographics: 55yo, F

HLA: A2; B44

Melanoma stage: IV

Relapse: No

Completed vaccination: Yes

Reason: (if no)

No. Vaccine doses: 4

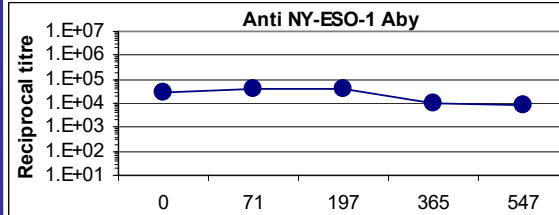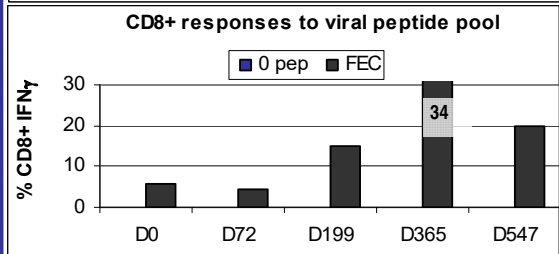

Summary

CD8 response: 21p, 26p

CD4 response: 21p

Antibody response: p

Examples of ICS FACS plots

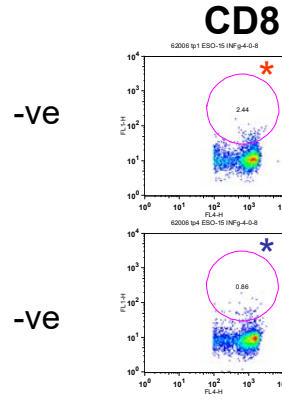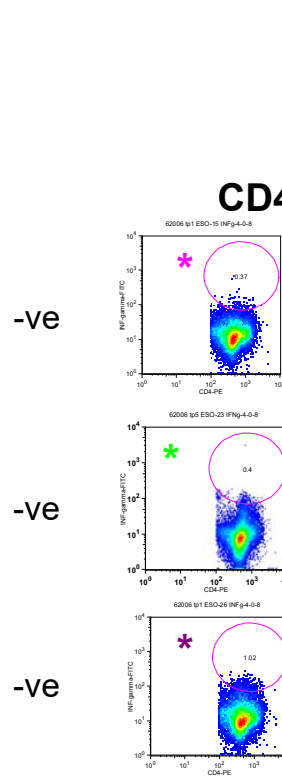

Overlapping NY-ESO-1 peptide ICS

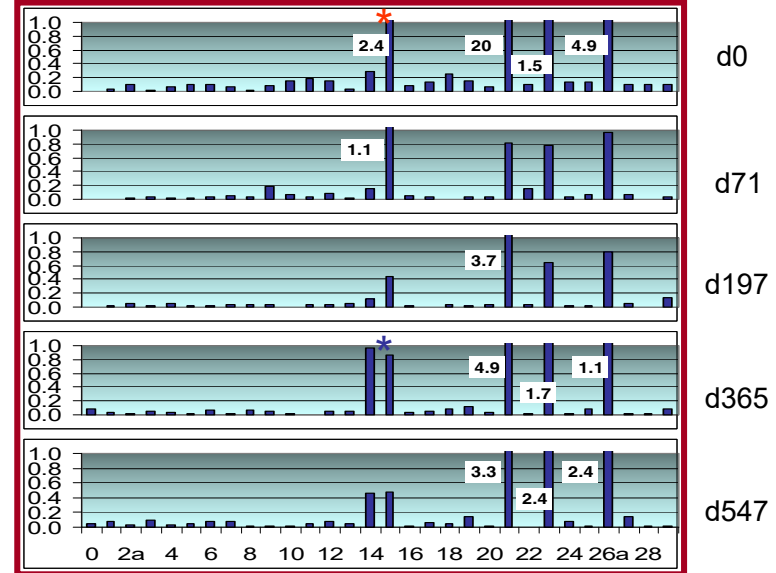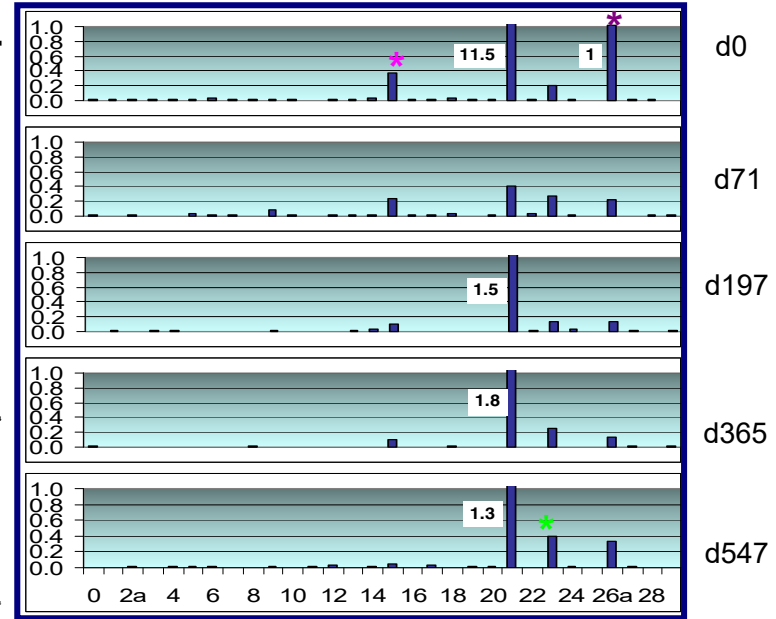

**Figure S7.12**

Patient information

ID: 054-001

Demographics: 61yo, F

HLA: A2; B35, B44; Cw5, Cw6

Melanoma stage: IIIc

Relapse: Yes Off study D70

Completed vaccination: No

Reason: (if no) PD D14

No. Vaccine doses: 3

No antibody titration

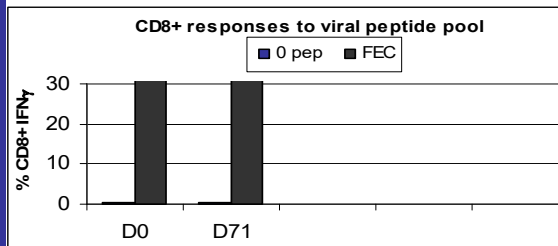

Summary

CD8 response: 15<sup>v</sup>, 16<sup>v</sup>

CD4 response: nil

Antibody response: NT

Examples of ICS  
FACS plots

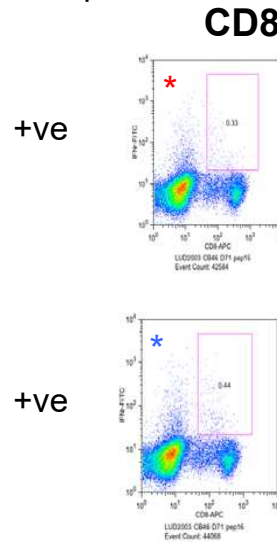

Overlapping NY-ESO-1 peptide ICS

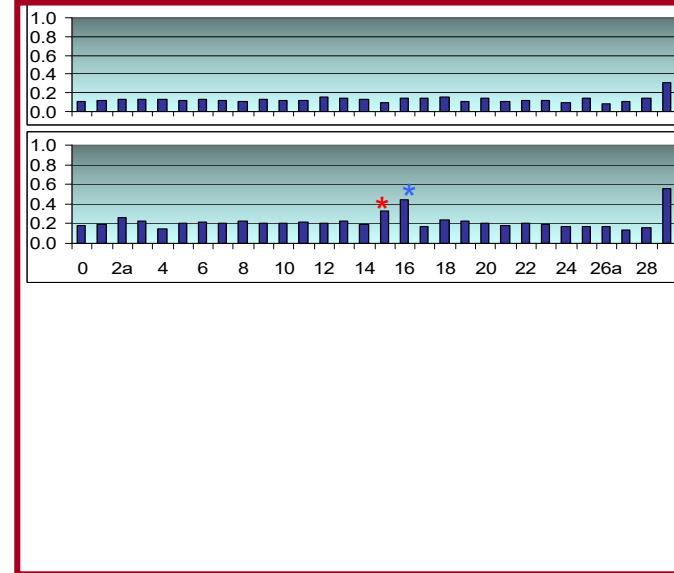

CD4

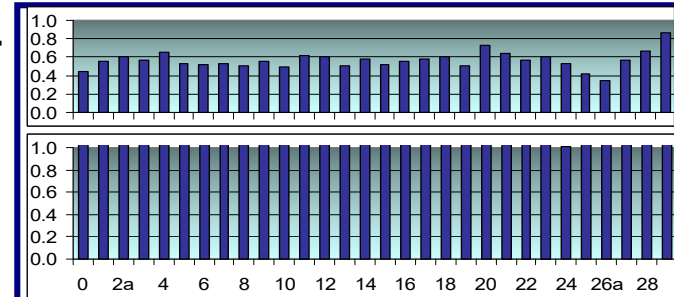

All D71 CD4 responses 1.0-1.6%

# Figure S7.13

Examples of ICS  
FACS plots

Overlapping NY-ESO-1 peptide ICS

**Patient information**  
 ID: 063-001  
 Demographics: 48yo, M  
 HLA: ND  
 Melanoma stage: IIIb  
 Relapse: Yes. Off study D183  
 Completed vaccination: No  
 Reason: PD D28  
 No. Vaccine doses: 3

**Anti NY-ESO-1 Aby**

**CD8+ responses to viral peptide pool**

Legend: 0 pep (blue), FEC (black)

**Summary**  
 CD8 response: nil  
 CD4 response: nil  
 Antibody response: v

CD8

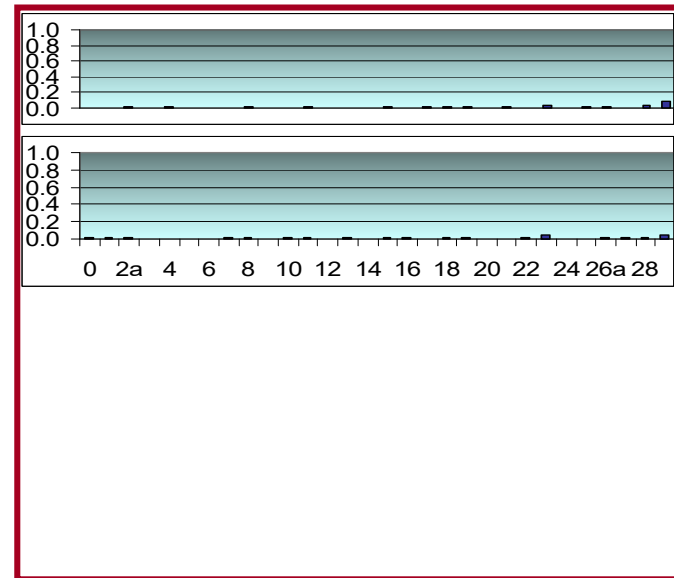

d0

d71

CD4

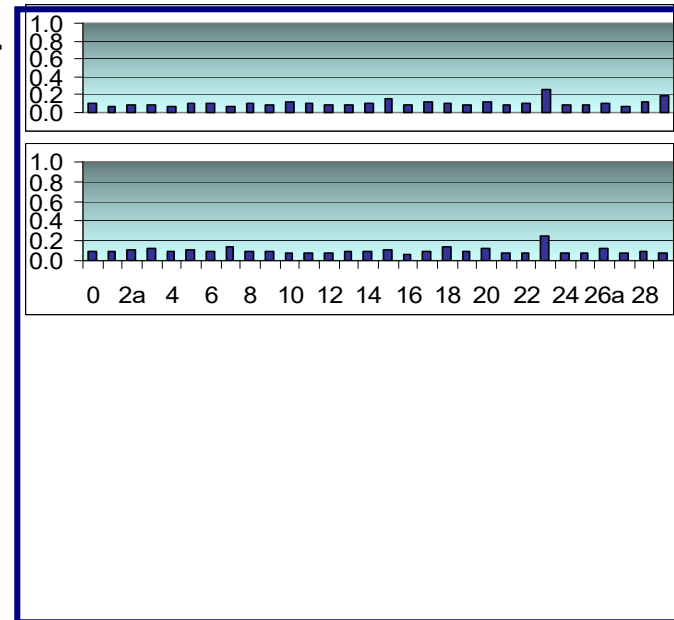

d0

d71

**Figure S7.14**

**Patient information**

ID: 063-004  
 Demographics: 55yo, M  
 HLA: A2; B8;  
 Melanoma stage: IIIc  
 Relapse: No  
 Completed vaccination: Yes  
 No. Vaccine doses:4

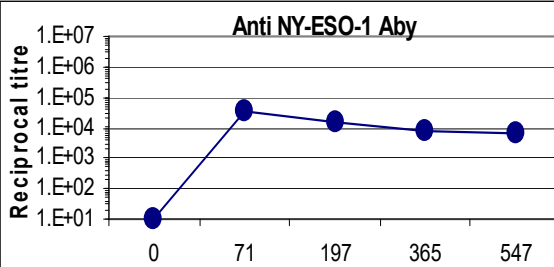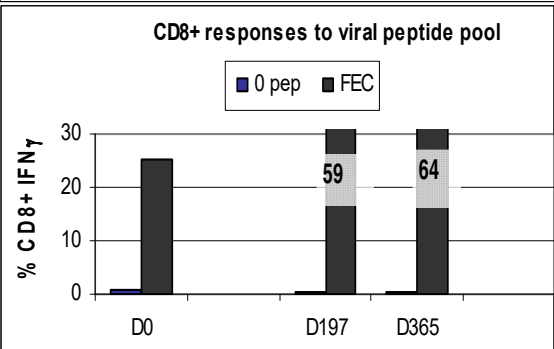

**Summary**

CD8 response: nil  
 CD4 response: nil  
 Antibody response: v

Examples of ICS  
 FACS plots

Overlapping NY-ESO-1 peptide ICS

**CD8**

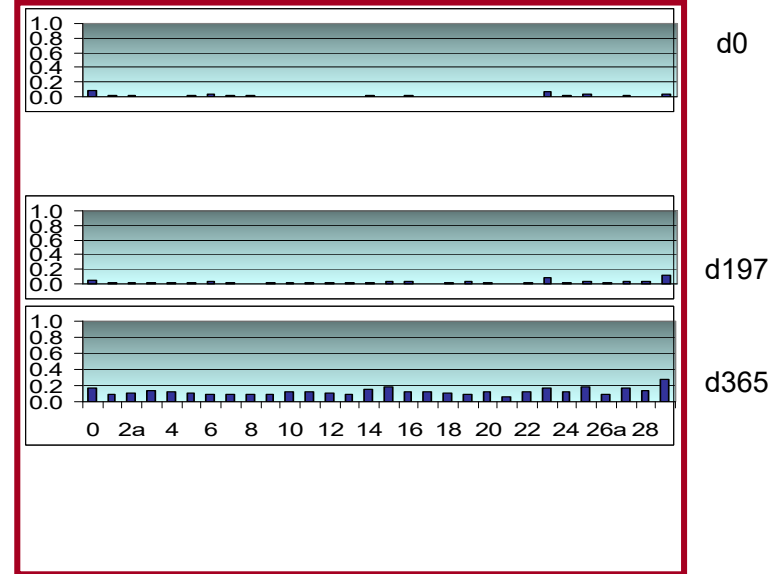

**CD4**

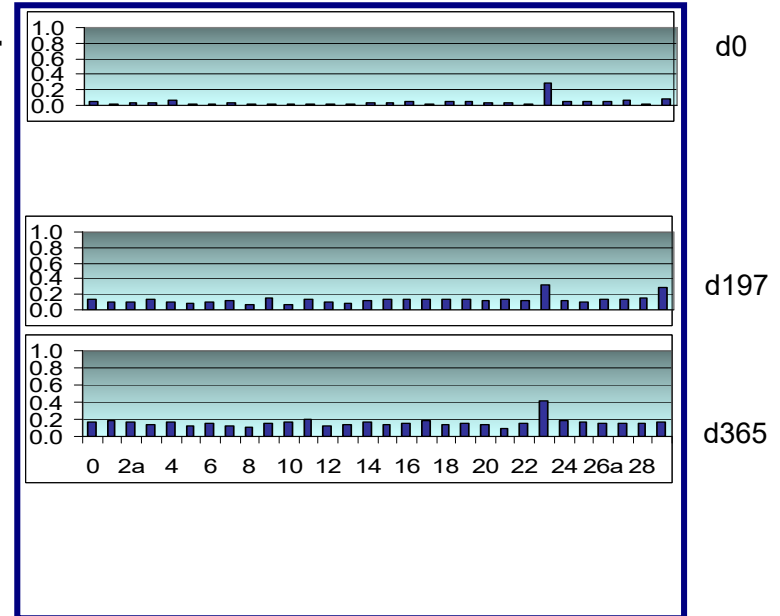

**Figure S7.15**

Patient information

ID: 063-005

Demographics: 63yo, M

HLA: A24, A29; B15, B35; Cw3, Cw4

Melanoma stage: IIIb

Relapse: No

Completed vaccination: Yes

Reason: (if no)

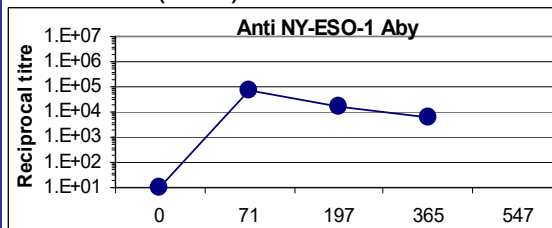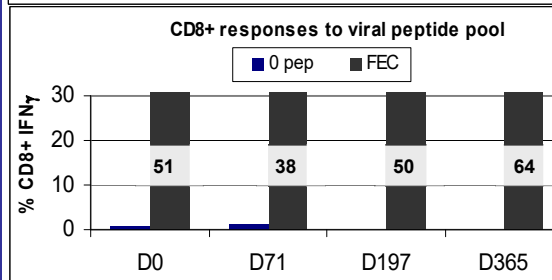

Summary

CD8 response: nil

CD4 response: nil high background

Antibody response: v

Examples of ICS  
FACS plots

Overlapping NY-ESO-1 peptide ICS

**CD8**

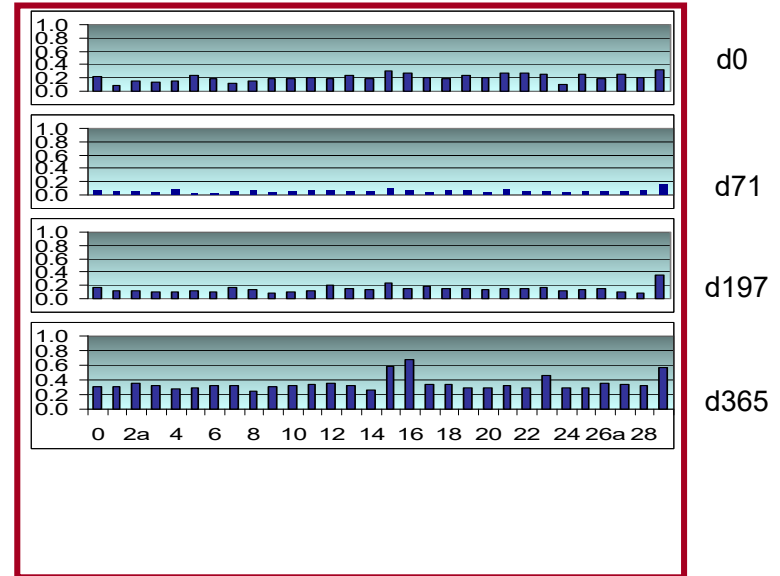

**CD4**

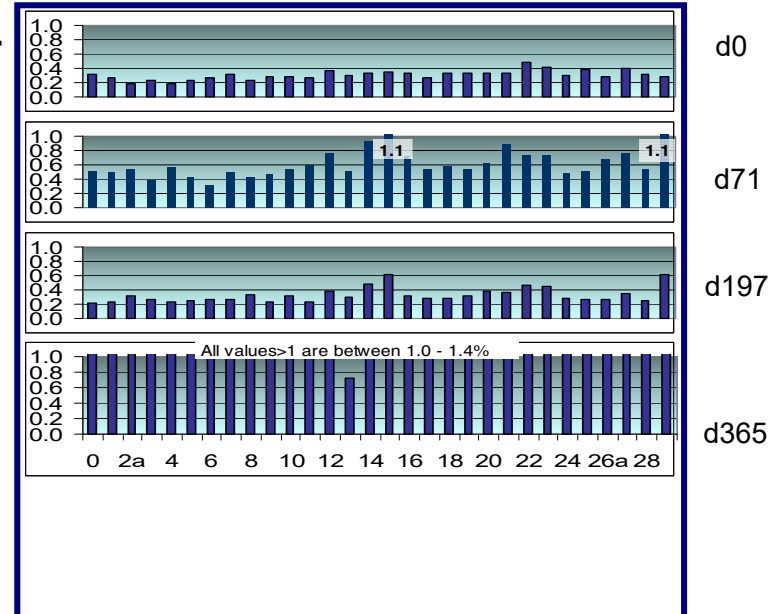

**Figure S7.16**

Patient information  
 ID: 074-002  
 Demographics: 51yo, M  
 HLA: A0203, A25; B18;  
 Melanoma stage: IIIb  
 Relapse: No  
 Completed vaccination: Yes  
 Reason: (if no)  
 No. Vaccine doses:4

**Anti NY-ESO-1 Aby**

| Time Point | Reciprocal titre |
|------------|------------------|
| 0          | ~1.E+01          |
| 71         | ~1.E+05          |
| 197        | ~1.E+05          |
| 365        | ~1.E+04          |
| 547        | ~1.E+04          |

**CD8+ responses to viral peptide pool**

| Time Point | FEC | 0 pep |
|------------|-----|-------|
| D0         | 44  | 0     |
| D71        | 50  | 0     |
| D197       | 58  | 0     |
| D365       | 54  | 0     |
| D547       | 52  | 0     |

Summary  
 CD8 response: nil  
 CD4 response: 14<sup>v</sup>, 15<sup>v</sup>  
 Antibody response: v

Examples of ICS  
 FACS plots

**CD8**

Overlapping NY-ESO-1 peptide ICS

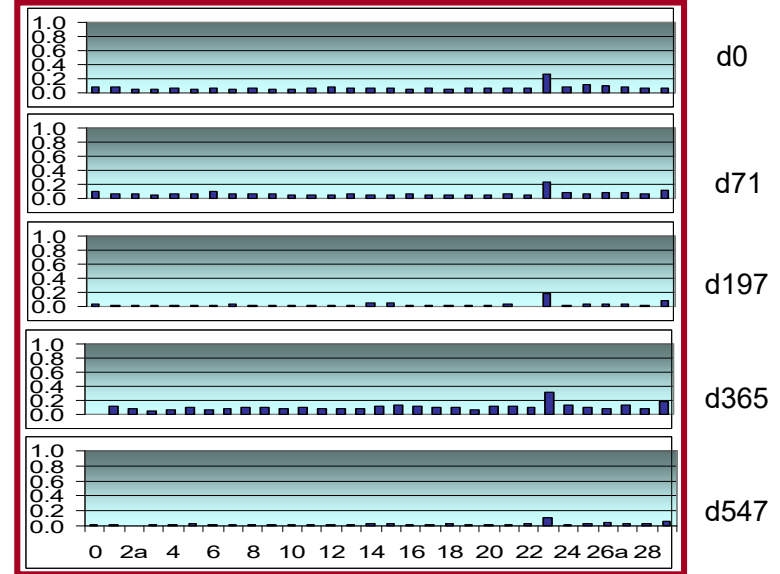

**CD4**

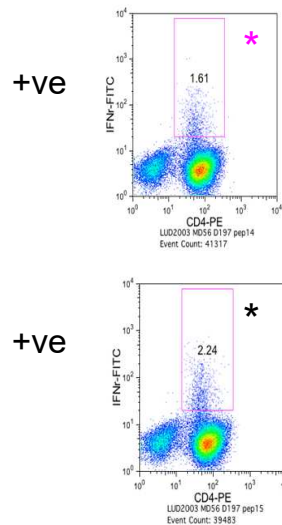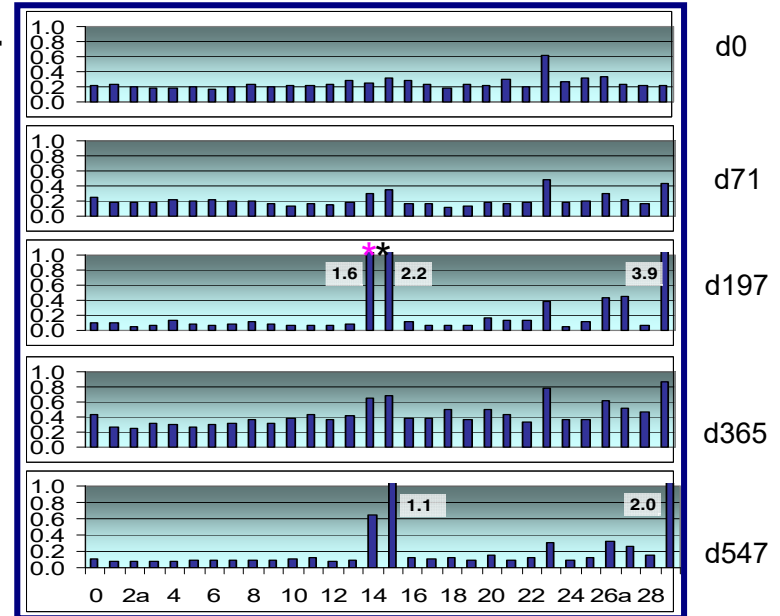



- ISCOMATRIX cohort

# Figure S7.17

## Patient information

ID: 013-004

Demographics: 33yo, F

HLA:A32,A68;B62,B51;Cw9,Cw15

Melanoma stage: IV; unknown primary

Relapse: Yes

Completed vaccination: Yes

Reason: PD D313

No. Vaccine doses: 4

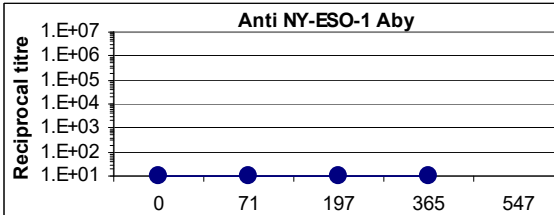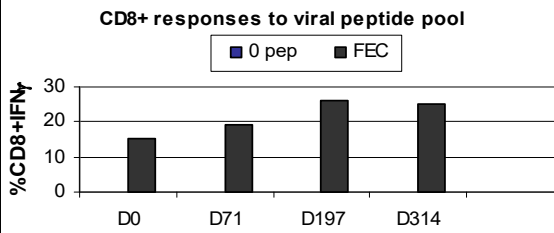

## Summary

CD8 response: nil

CD4 response: 20<sup>p</sup>, 21<sup>p</sup>, 22<sup>p</sup>, 24<sup>p</sup>

Hi BG

Antibody response: nil

## Examples of ICS FACS plots

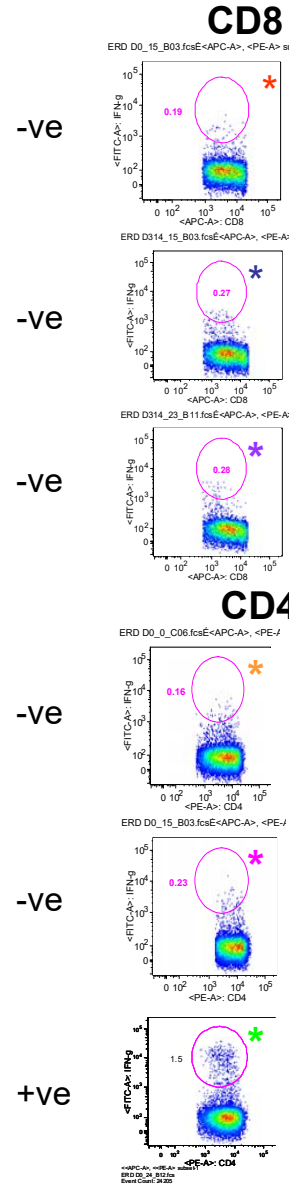

## Overlapping NY-ESO-1 peptide ICS

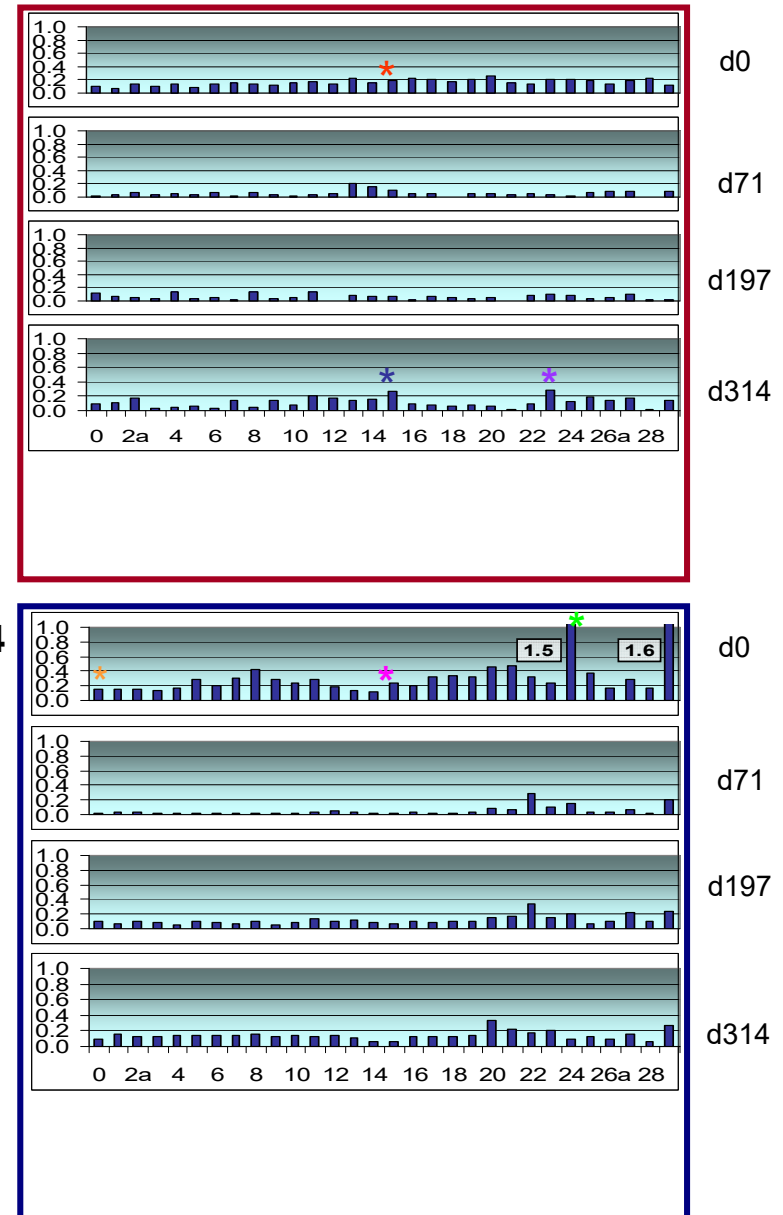

# Figure S7.18

## Patient information

ID: 013-006

Demographics: 64yo,M

HLA:A1,A11; B15,B27; Cw1,Cw9

Melanoma stage: IIIc; cutaneous

Relapse: Yes

Completed vaccination: No

Reason: PD D169

No. Vaccine doses: 3

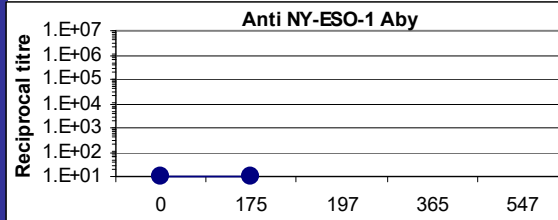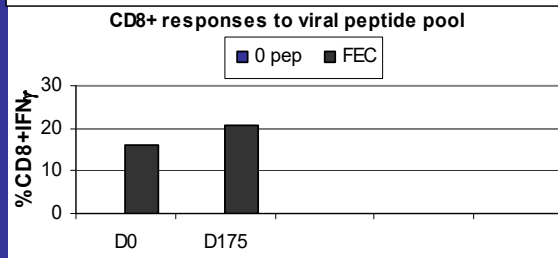

## Summary

CD8 response: nil

CD4 response: nil

Antibody response: nil

## Examples of ICS FACS plots

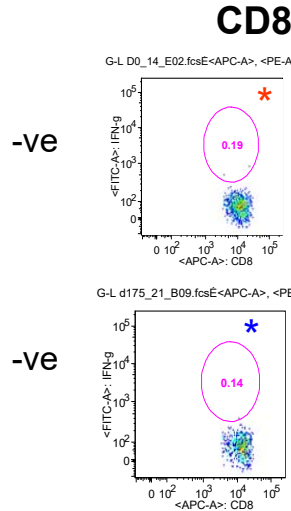

## Overlapping NY-ESO-1 peptide ICS

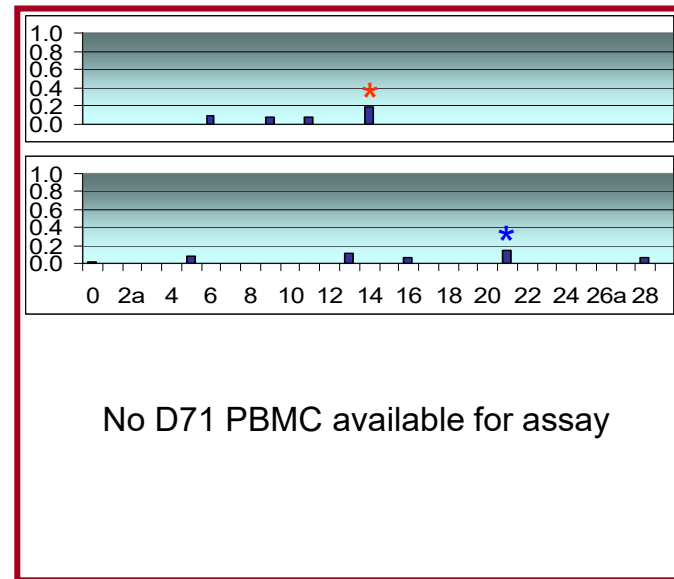

## CD4

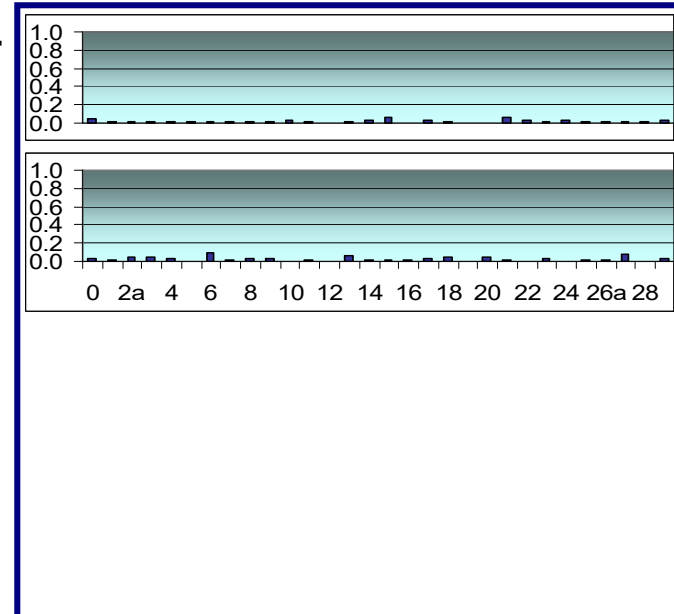

# Figure S7.19

## Patient information

ID: 013-007

Demographics: 81yo, M

HLA: A1, A2; B8, B50; Cw6, Cw7

Melanoma stage: IIc; cutaneous

Relapse: No

Completed vaccination: Yes

Reason: (if no)

No. Vaccine doses: 4

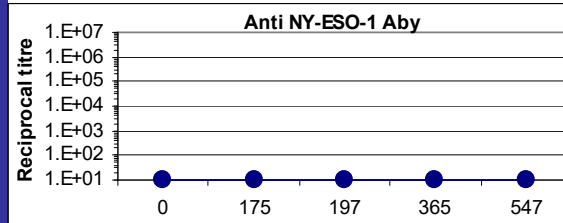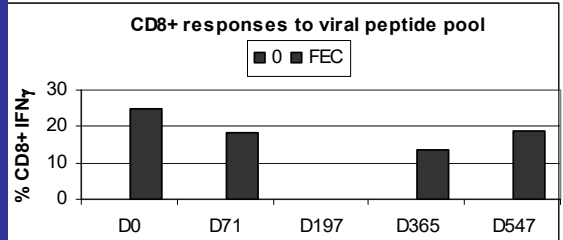

## Summary

CD8 response: nil.

CD4 response: nil

Antibody response: nil

## Examples of ICS FACS plots

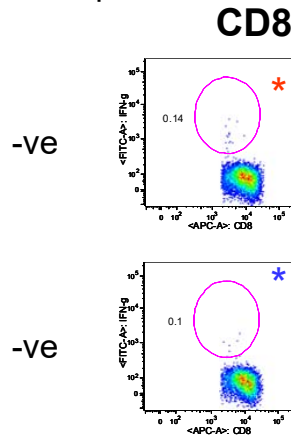

## Overlapping NY-ESO-1 peptide ICS

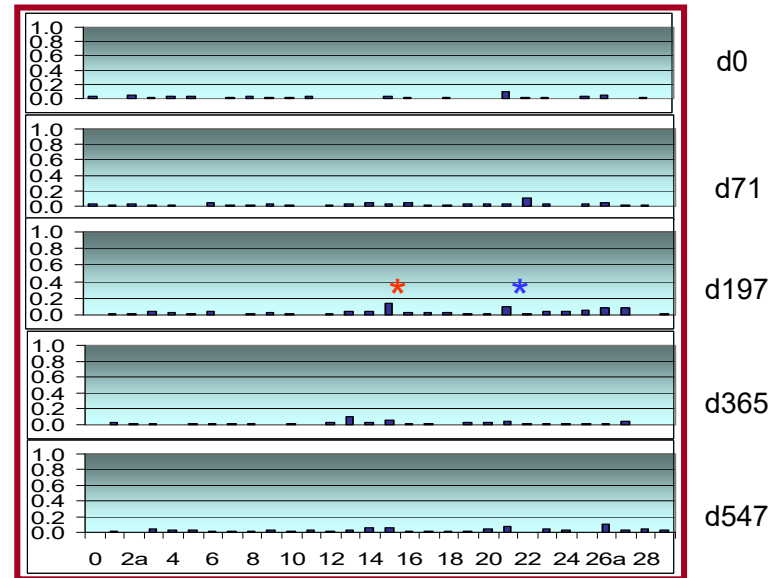

## CD4

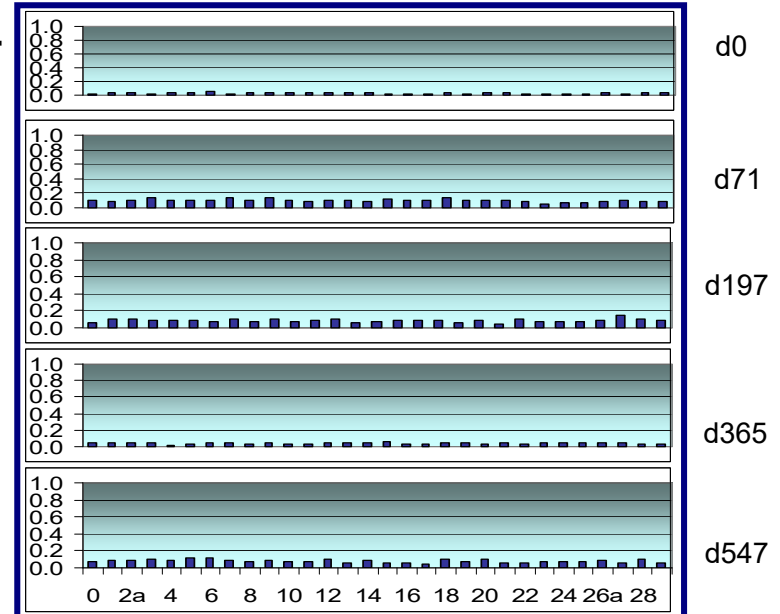

## Figure S7.20

### Patient information

ID: 013-011

Demographics: 58yo, F

HLA: A3,A23; B7,B44; Cw4, Cw7

Melanoma stage: IIIc; cutaneous

Relapse: Yes

Completed vaccination: Yes

Reason: PD D378

No. Vaccine doses: 4

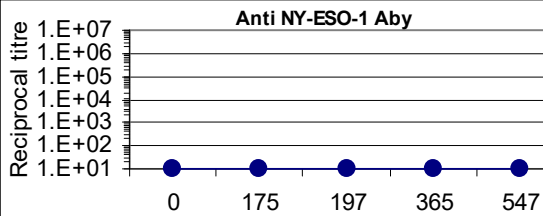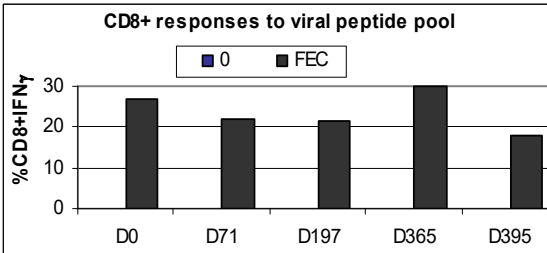

### Summary

CD8 response: nil

CD4 response: nil

Antibody response: nil

Examples of ICS  
FACS plots

CD8

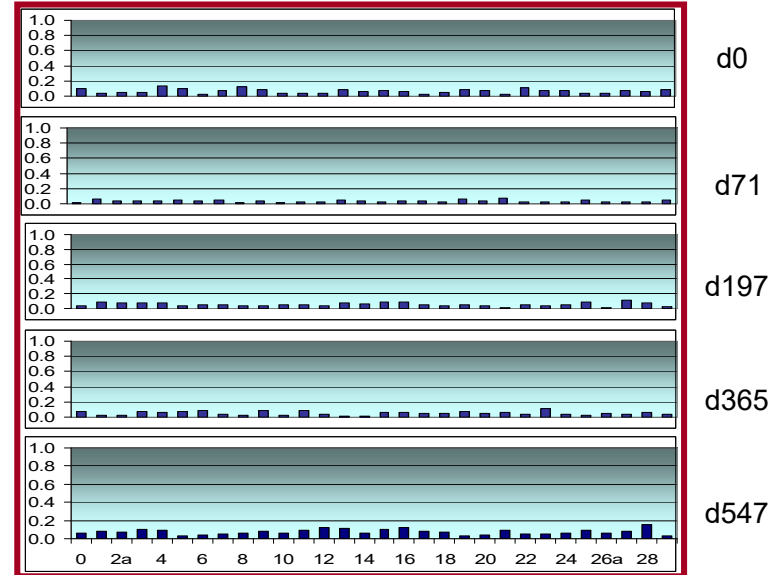

CD4

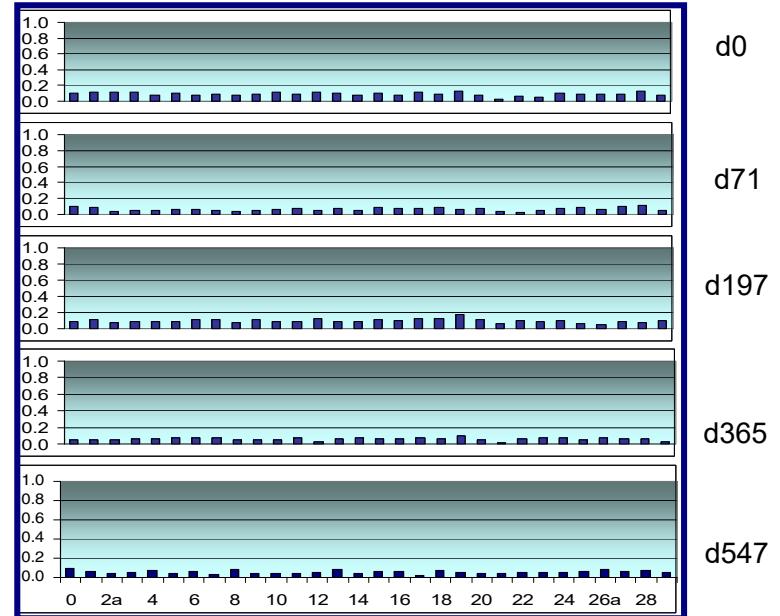

# Figure S7.21

## Patient information

ID: 013-012

Demographics: 69yo, F

HLA: A2; B39, B60; Cw10, Cw12

Melanoma stage: IIIc; cutaneous

Relapse: Yes

Completed vaccination: No.

Reason: PD D83

No. Vaccine doses: 3

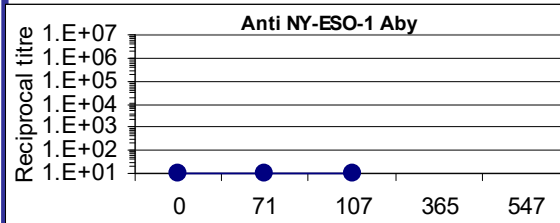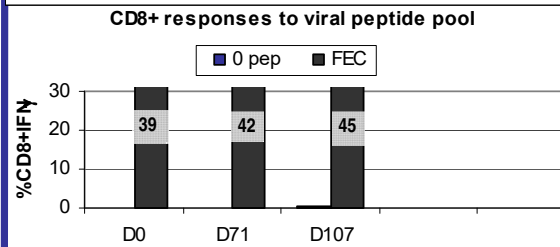

## Summary

CD8 response: 15<sup>p</sup>, 25<sup>p</sup> high background

D107

CD4 response: nil

Antibody response: nil

## Examples of ICS FACS plots

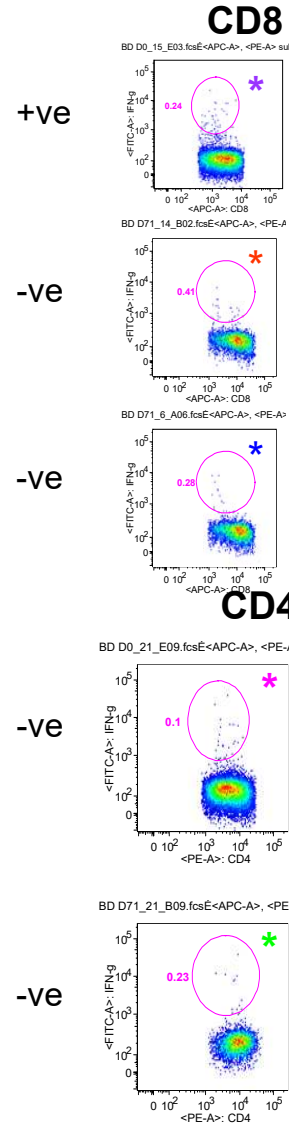

## Overlapping NY-ESO-1 peptide ICS

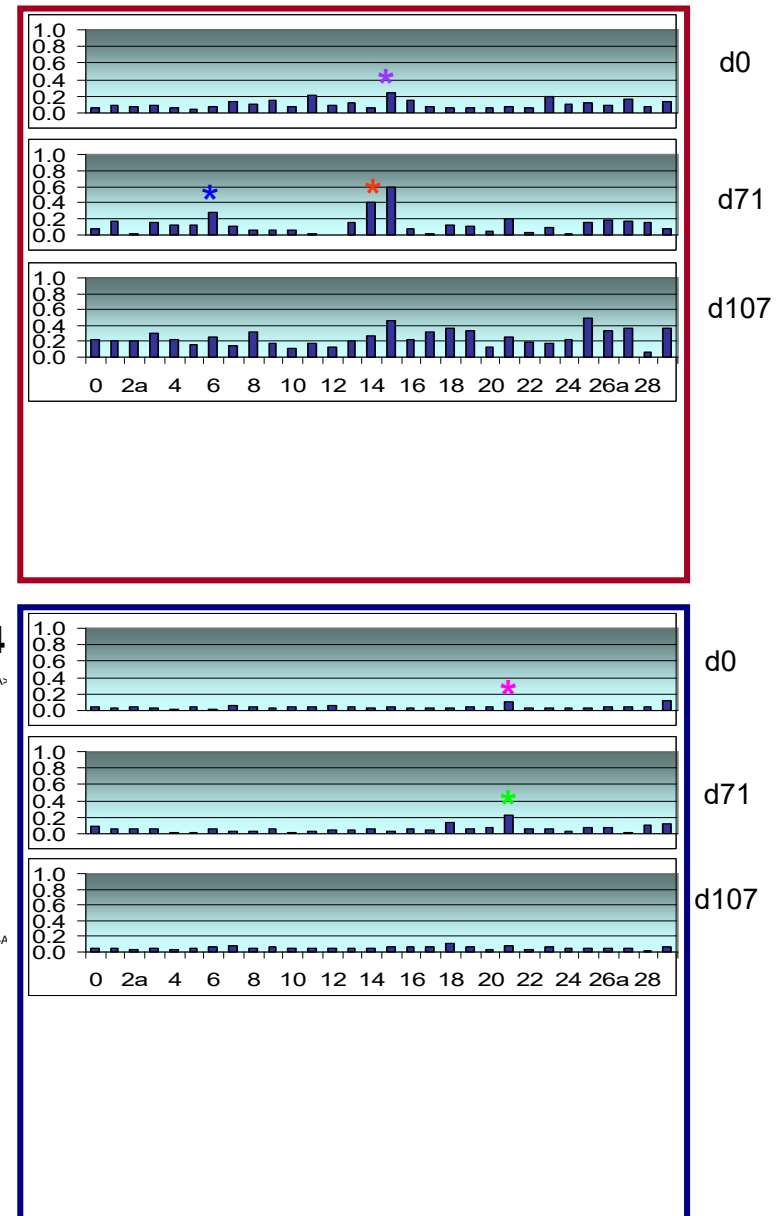

**Figure S7.22**

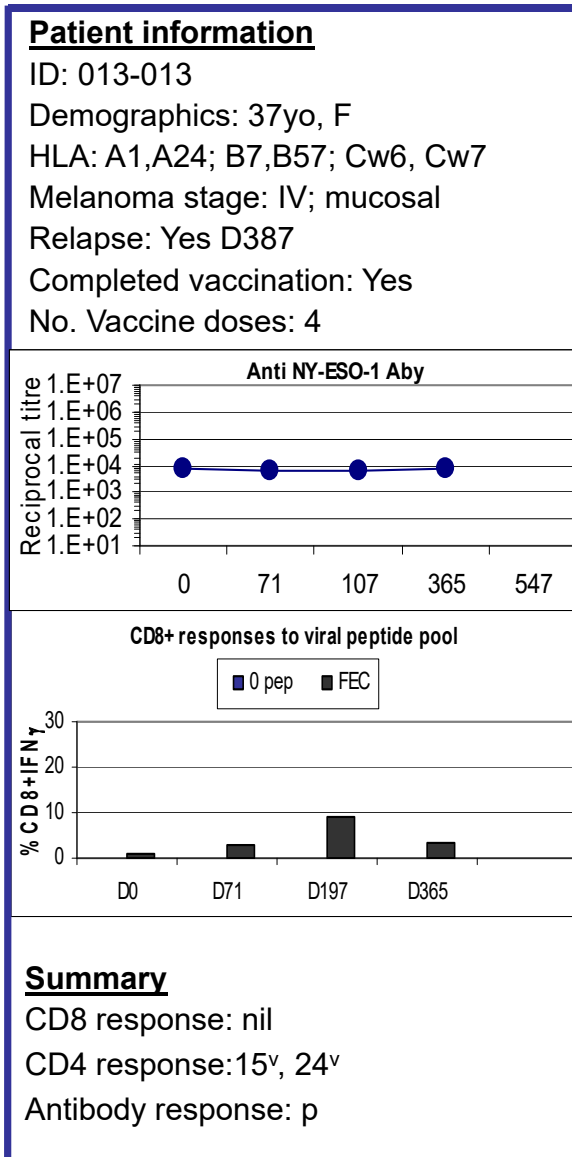

Examples of ICS  
 FACS plots

Overlapping NY-ESO-1 peptide ICS

CD8

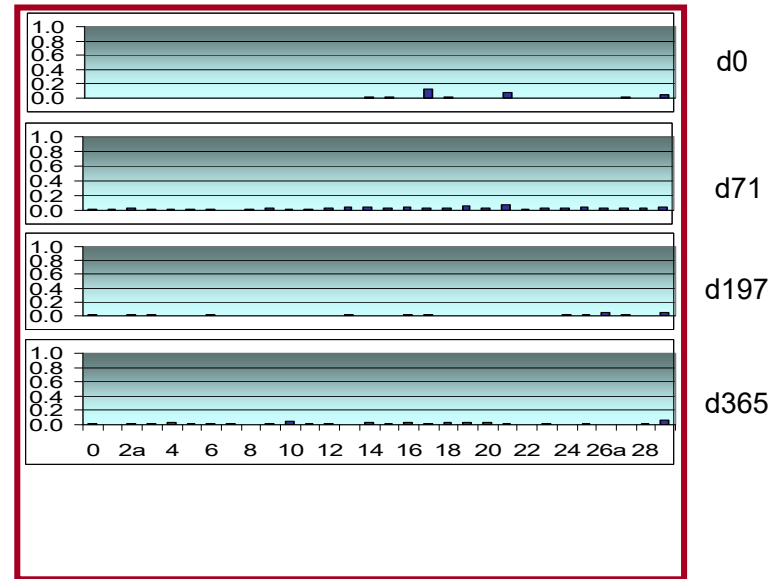

CD4

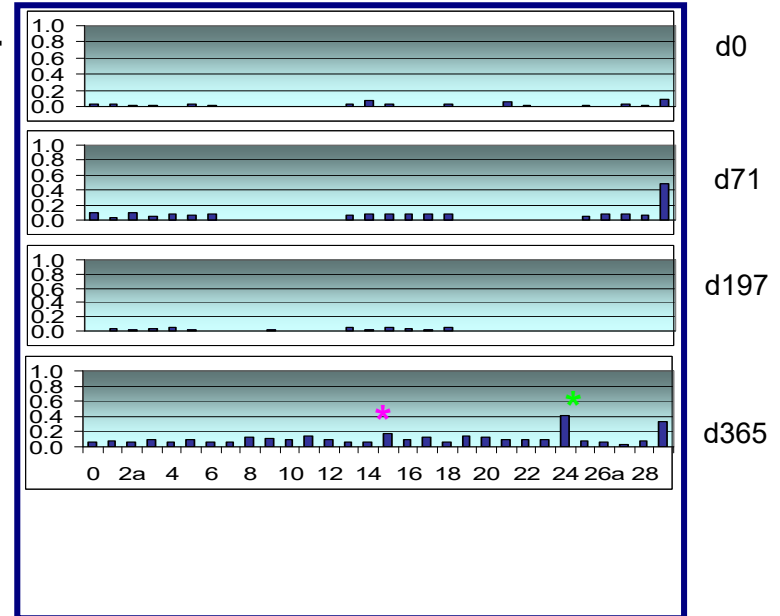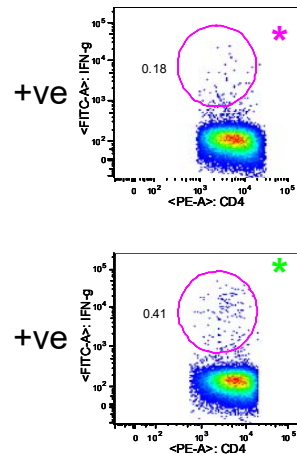

### Figure S7.23

#### Patient information

ID: 013-014

Demographics: 35yo, F

HLA:A2,A80; B62,B58; Cw3,Cw7

Melanoma stage: IV; cutaneous

Relapse: Yes

Completed vaccination: No

Reason: PD D127

No. Vaccine doses: 3

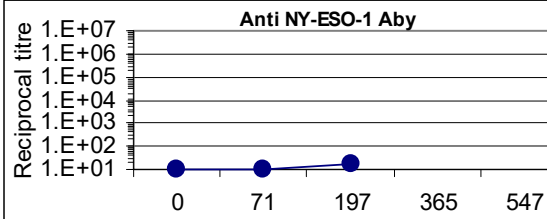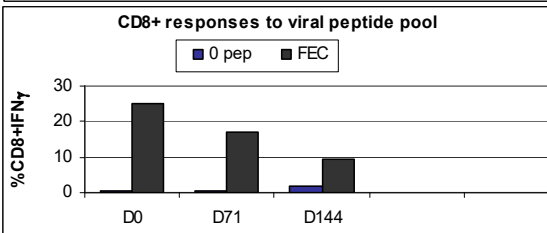

#### Summary

CD8 response: high background, non-specific responses

CD4 response: 3<sup>p</sup>, 4<sup>p</sup>, 13<sup>p</sup>, 14<sup>p</sup>, 15<sup>p</sup>, 16<sup>p</sup>, 20<sup>p</sup>, 26<sup>p</sup>, 27<sup>p</sup>, 28<sup>p</sup>. High background. Ab response: nil

#### Examples of ICS FACS plots

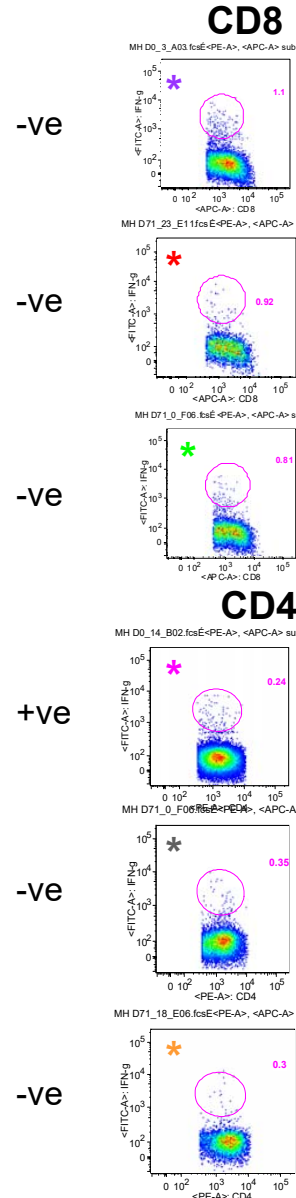

#### Overlapping NY-ESO-1 peptide ICS

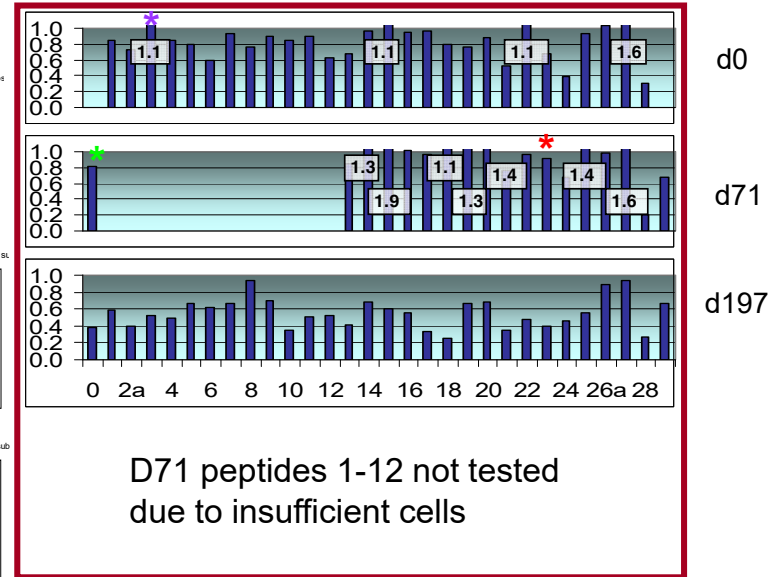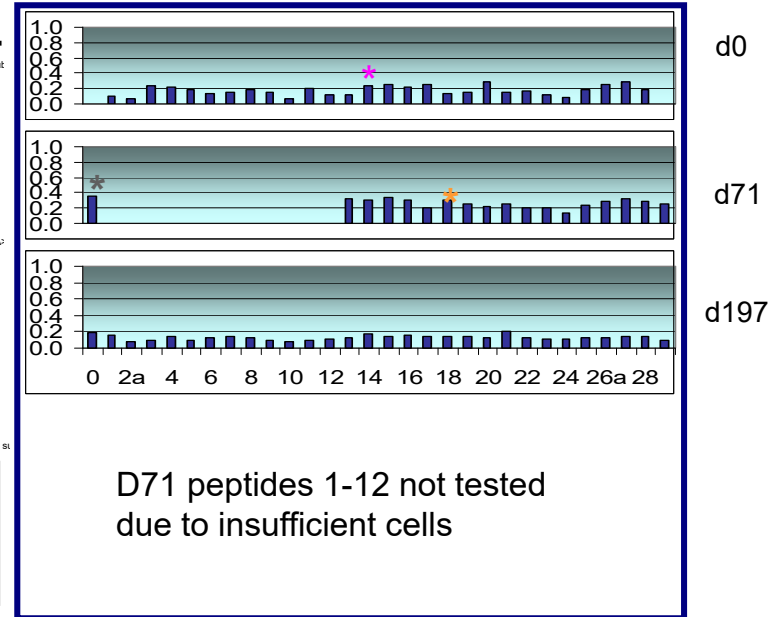



**Figure S7.24**

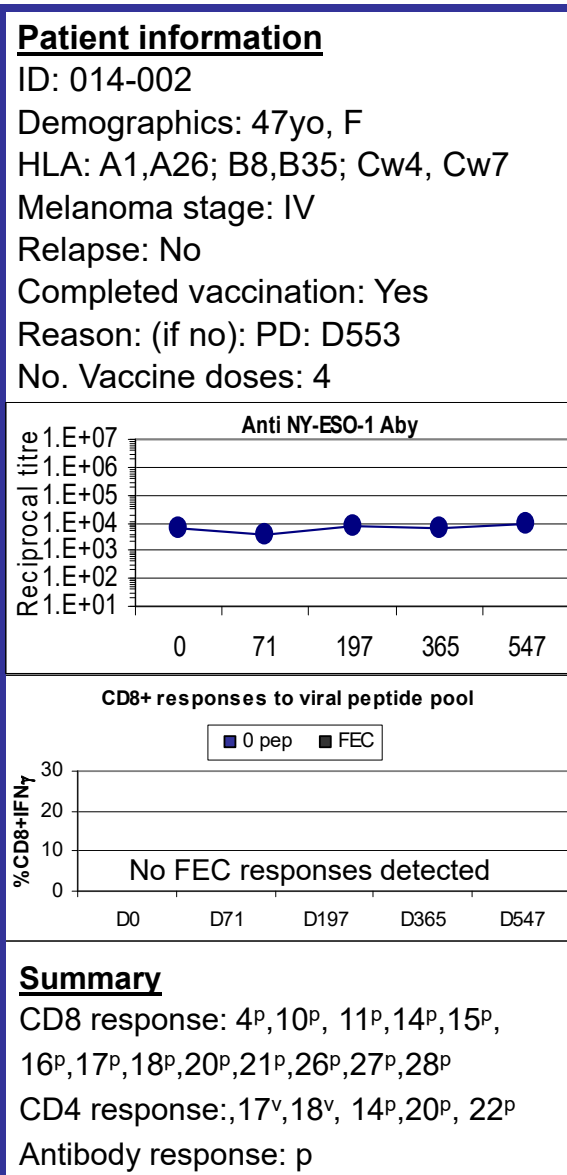

Examples of ICS FACS plots

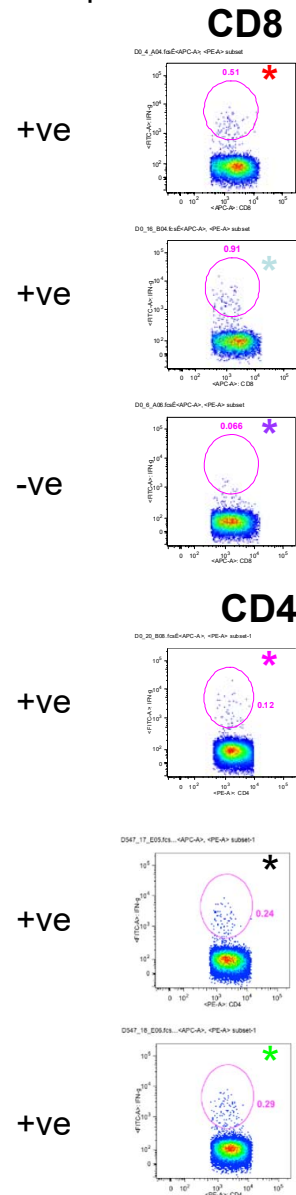

Overlapping NY-ESO-1 peptide ICS

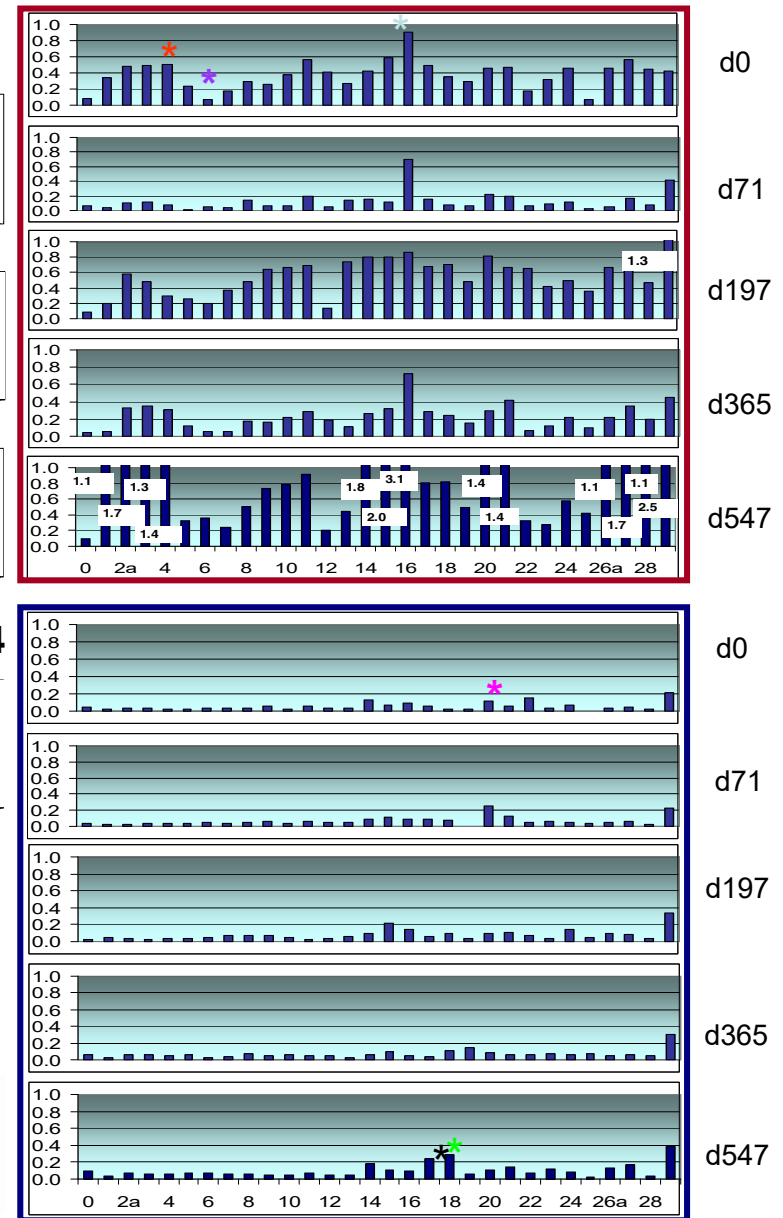

# Figure S7.25

## Patient information

ID: 014-006

Demographics: 55yo, F

HLA: A9201; B8, B60; Cw3, Cw7

Melanoma stage: IV

Relapse: No

Completed vaccination: Yes

Reason: (if no)

No. Vaccine doses: 4

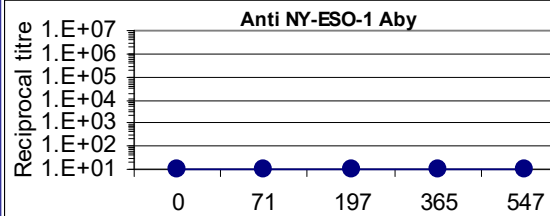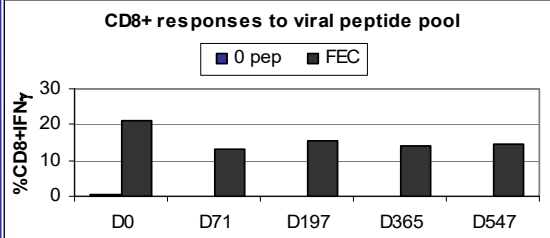

## Summary

CD8 response: 15<sup>v</sup>

CD4 response: nil

Antibody response: nil

## Examples of ICS FACS plots

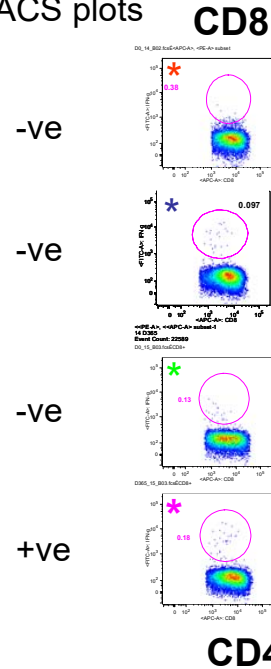

## Overlapping NY-ESO-1 peptide ICS

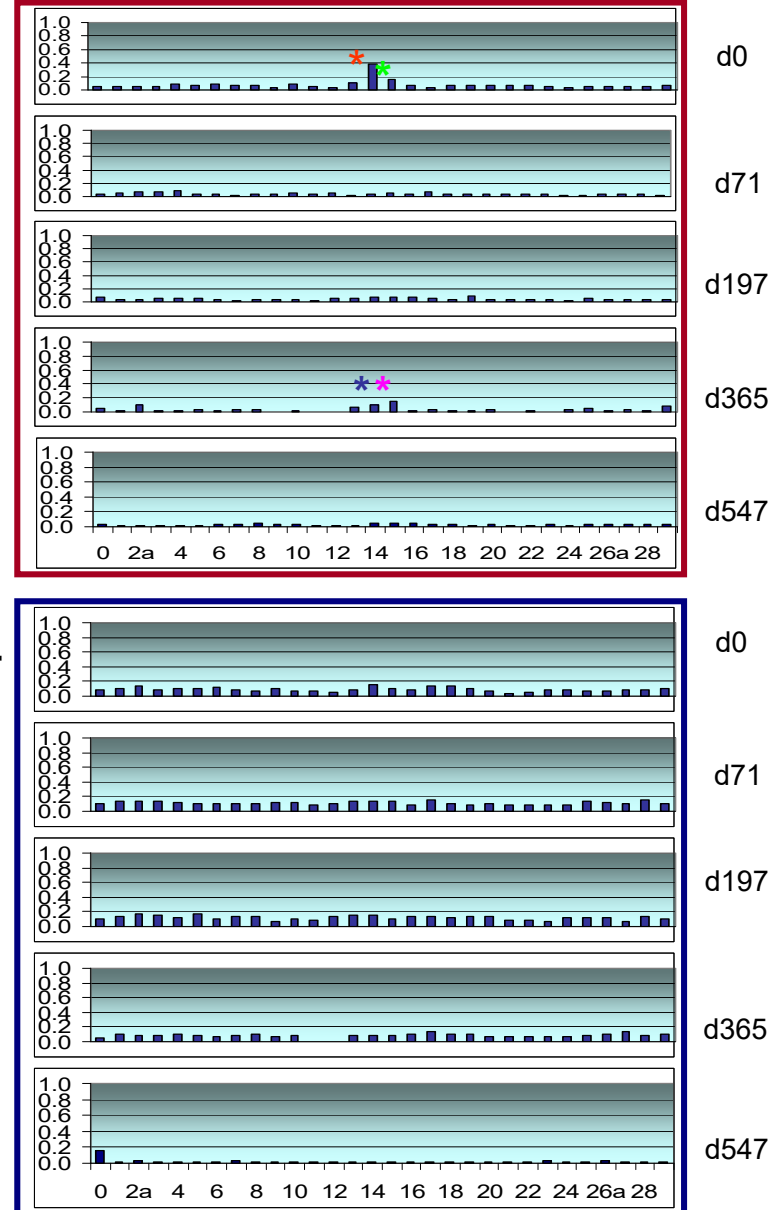

# Figure S7.26

## Patient information

ID: 014-008

Demographics: 64yo, F

HLA: A1,A3; B35, B57; Cw4,Cw6

Melanoma stage: IV

Relapse: Yes

Completed vaccination: Yes

Reason: PD D207

No. Vaccine doses: 4

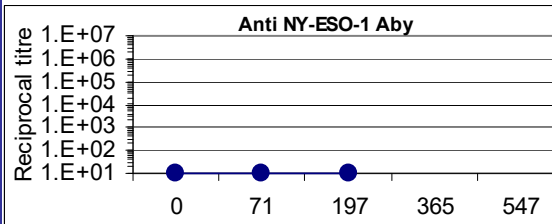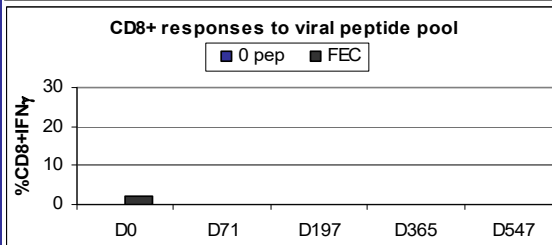

## Summary

CD8 response: nil

CD4 response: nil

Antibody response: nil

## Examples of ICS FACS plots

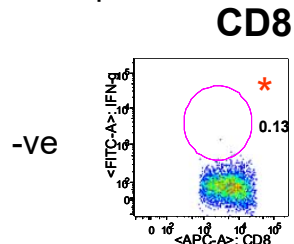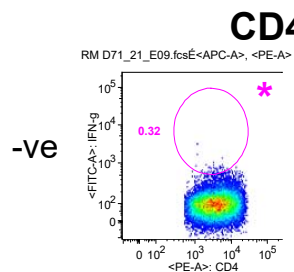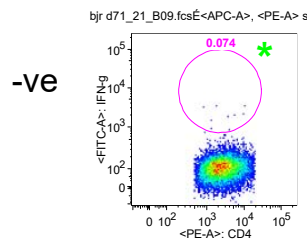

## Overlapping NY-ESO-1 peptide ICS

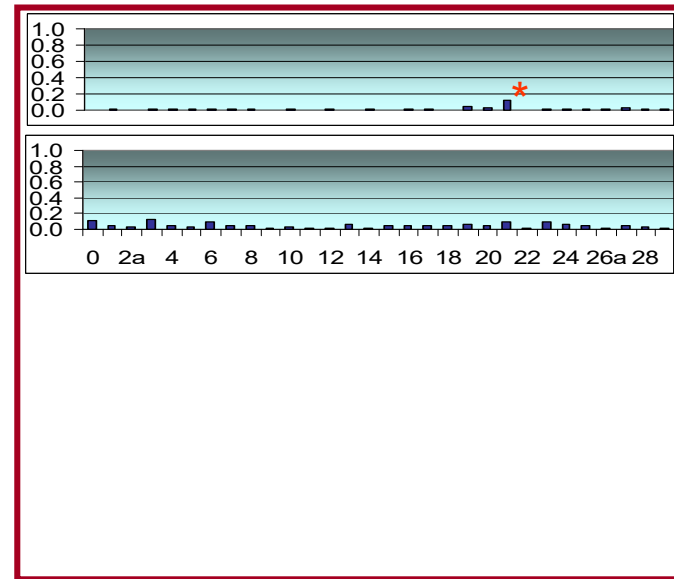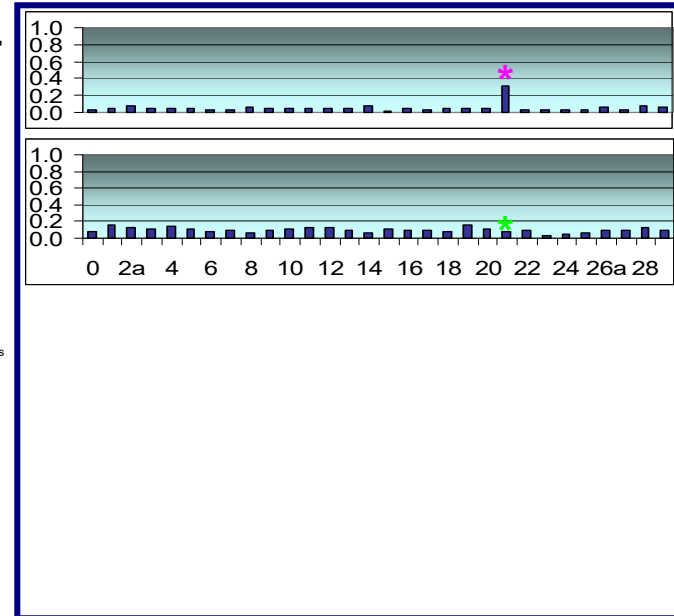

**Figure S7.27**

Patient information

ID: 014-011

Demographics: 40yo, F

HLA: A9201; B44, B8;

Melanoma stage: IV

Relapse: No

Completed vaccination: Yes

Reason: (if no)

No. Vaccine doses: 4

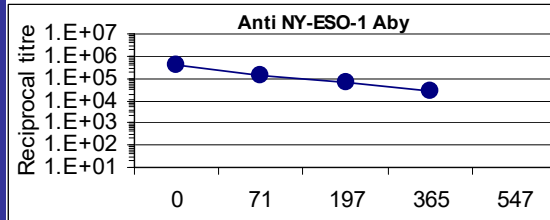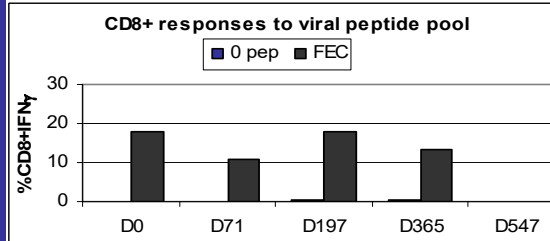

Summary

CD8 response: 21<sup>v</sup>, 22<sup>v</sup>, 23<sup>v</sup> only +ve at D71; 27<sup>p</sup>, 28<sup>p</sup>;

CD4 response: nil

Antibody response: p

Examples of ICS FACS plots

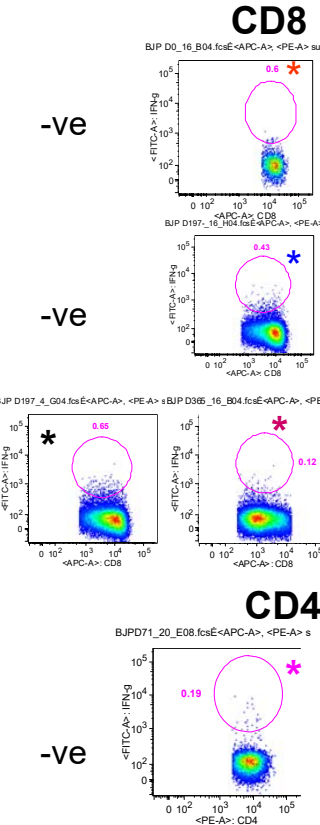

Overlapping NY-ESO-1 peptide ICS

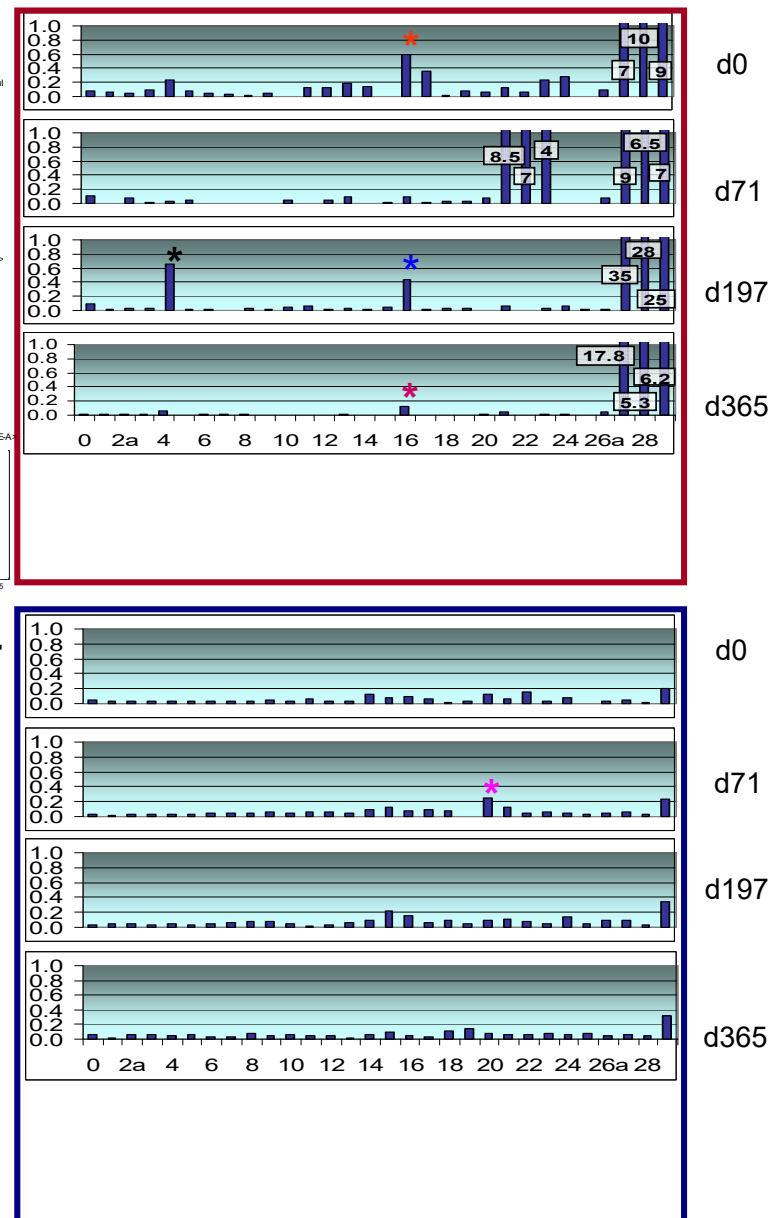

# Figure S7.28

## Patient information

ID: 014-013  
 Demographics: 74yo, M  
 HLA:A24, A30; B7, B18; Cw5, Cw7  
 Melanoma stage: IIIc  
 Relapse: Yes  
 Completed vaccination: No  
 Reason: PD D99  
 No. Vaccine doses: 3

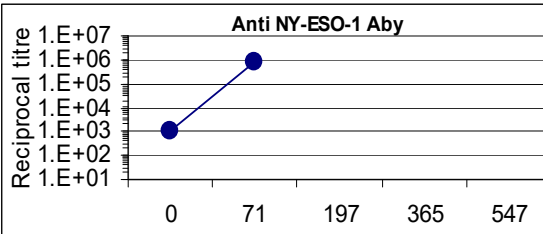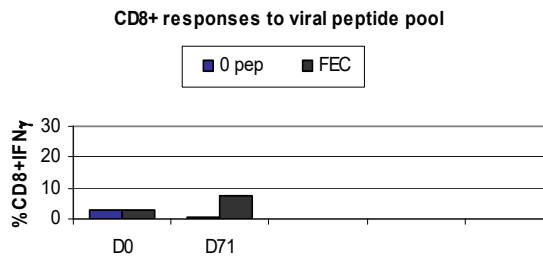

## Summary

CD8 response: 12<sup>v</sup>, 19<sup>v</sup>, 23<sup>v</sup>, 24<sup>v</sup>  
 CD4 response: 21<sup>v</sup>, 20<sup>p</sup>  
 Antibody response: v

## Examples of ICS FACS plots

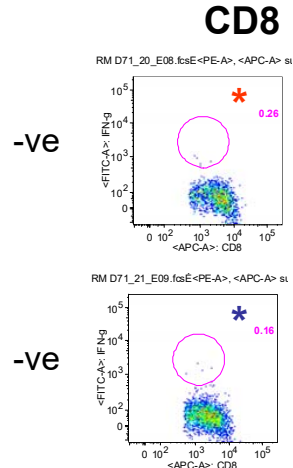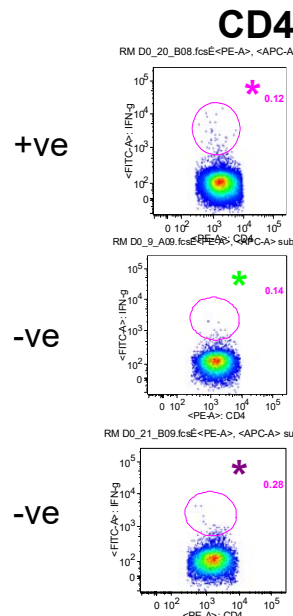

## Overlapping NY-ESO-1 peptide ICS

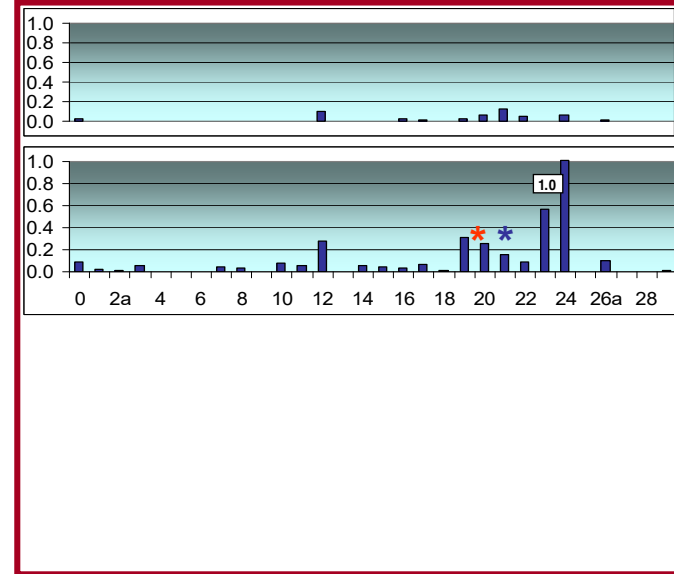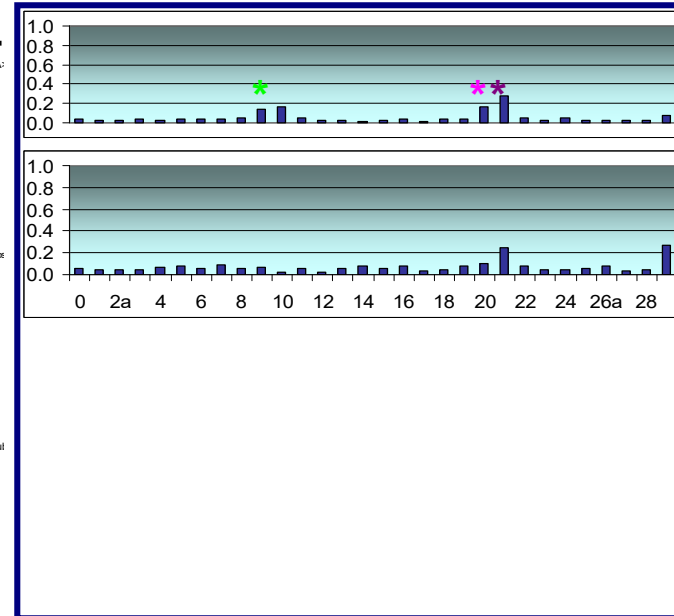

**Figure S7.29**

Patient information

ID: 062-003  
 Demographics: 45yo,F  
 HLA: A1, A68; B40, B57;  
 Melanoma stage: IIIb  
 Relapse: No  
 Completed vaccination: Yes  
 Reason: (if no)  
 No. Vaccine doses: 4

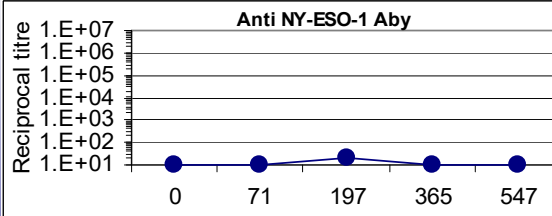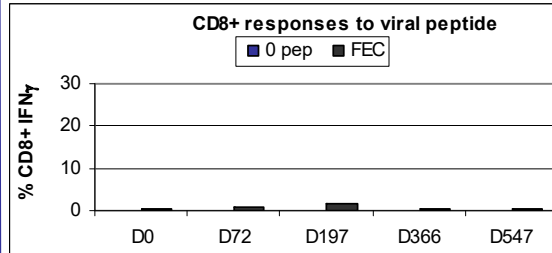

Summary

CD8 response: nil  
 CD4 response: 26<sup>v</sup>  
 Antibody response: nil

Examples of ICS FACS plots

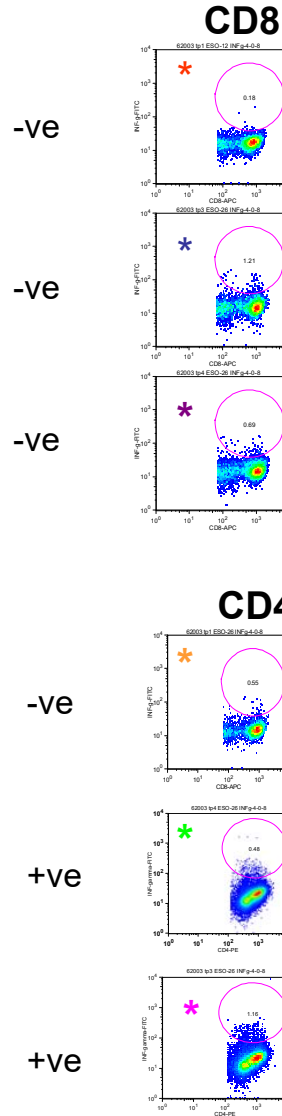

Poor patterns

Overlapping NY-ESO-1 peptide ICS

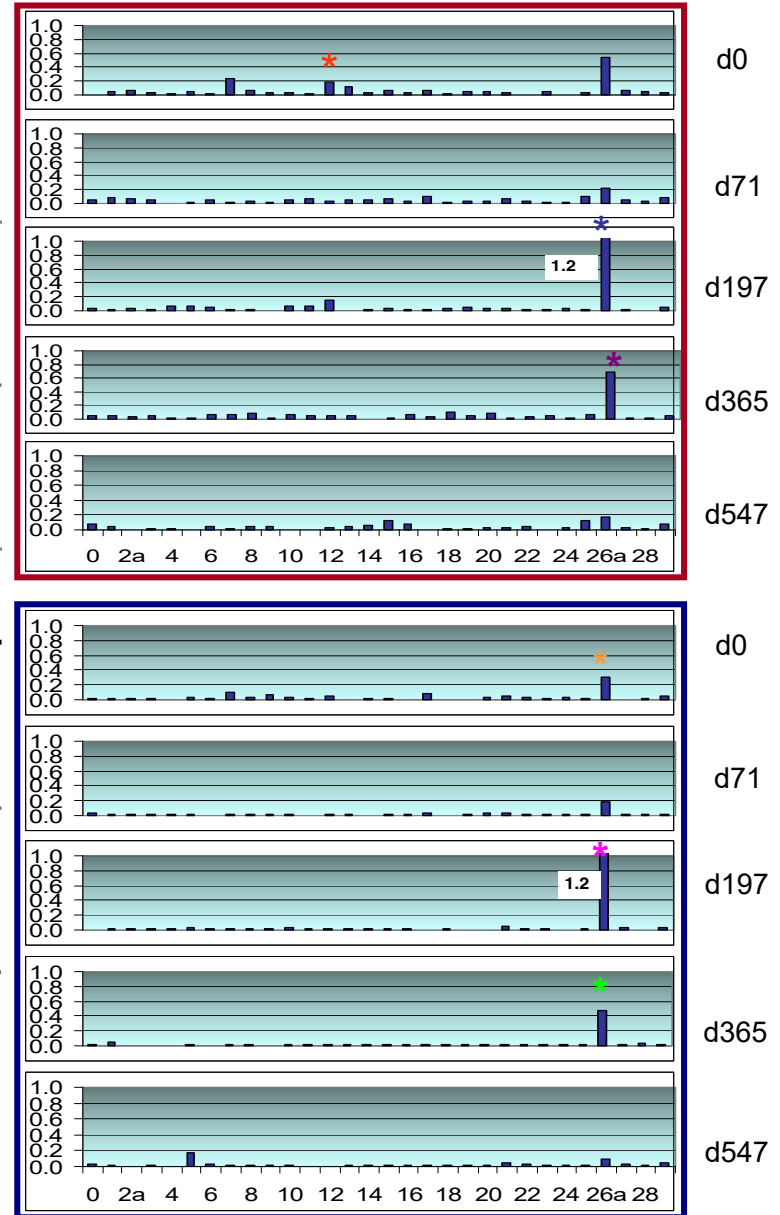

**Figure S7.30**

Examples of ICS  
FACS plots

Overlapping NY-ESO-1 peptide ICS

Patient information

ID: 054-002

Demographics: 36 yo, F

HLA: A1, A2; B7, B50; Cw6, Cw7

Melanoma stage: IIIc

Relapse: No

Completed vaccination: Yes

Reason: (if no)

No. Vaccine doses: 4

No antibody titration

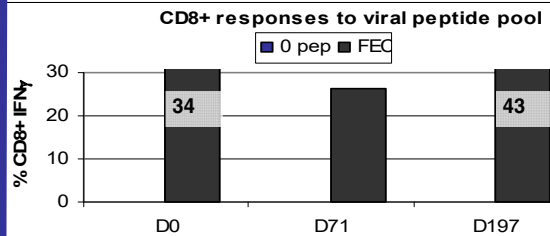

Summary

CD8 response: nil

CD4 response: nil

Antibody response: NT

CD8

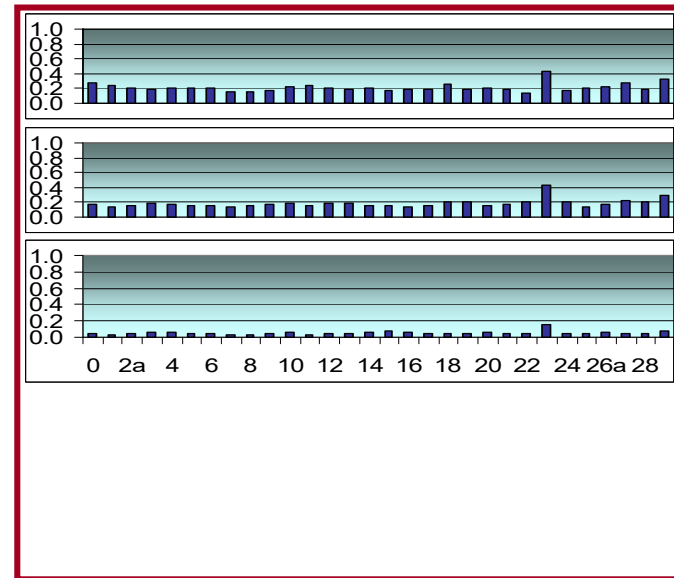

d0

d71

d197

CD4

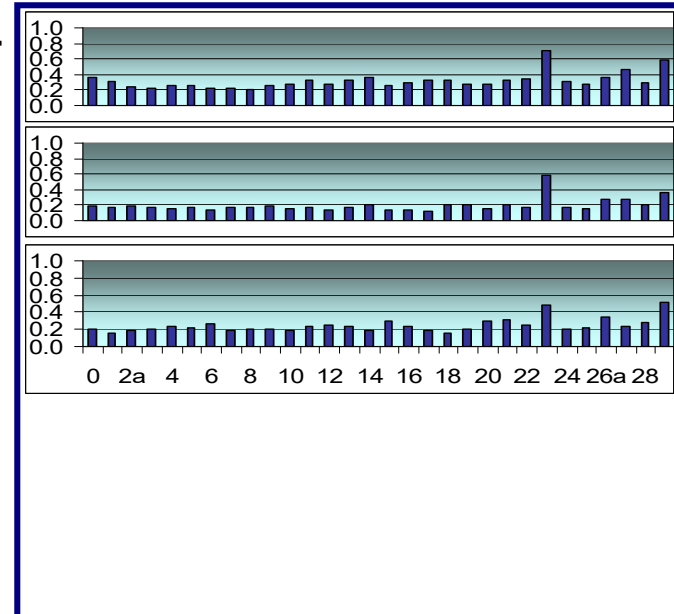

d0

d71

d197

**Figure S7.31**

Patient information

ID: 063-003  
 Demographics: 55yo, F  
 HLA: A2, A32; B27; Cw1, Cw3  
 Melanoma stage: IIIc  
 Relapse: No  
 Completed vaccination: Yes  
 Reason: (if no)  
 No. Vaccine doses: 4

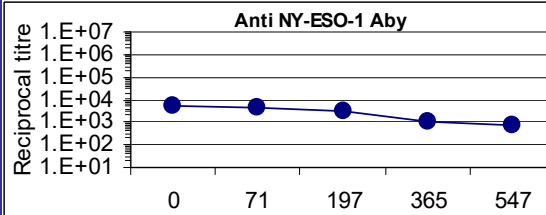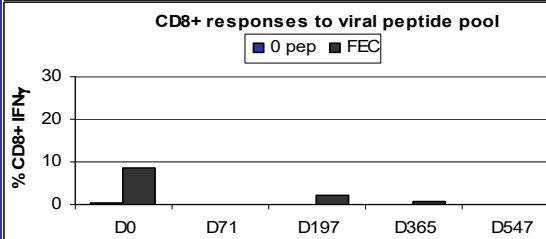

Summary

CD8 response: 21<sup>v</sup>, 16<sup>p</sup>  
 CD4 response: nil. High background  
 Antibody response: p

Examples of ICS FACS plots

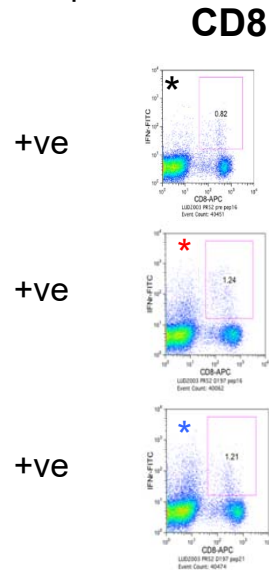

Overlapping NY-ESO-1 peptide ICS

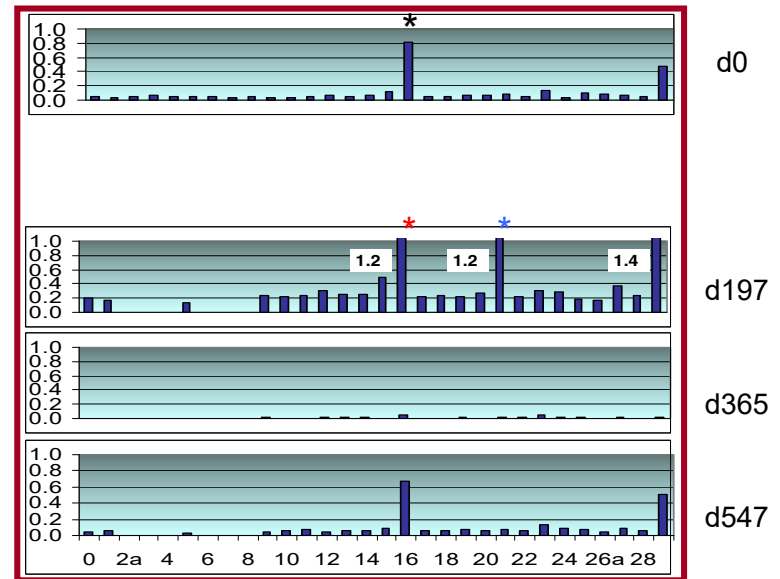

**CD4**

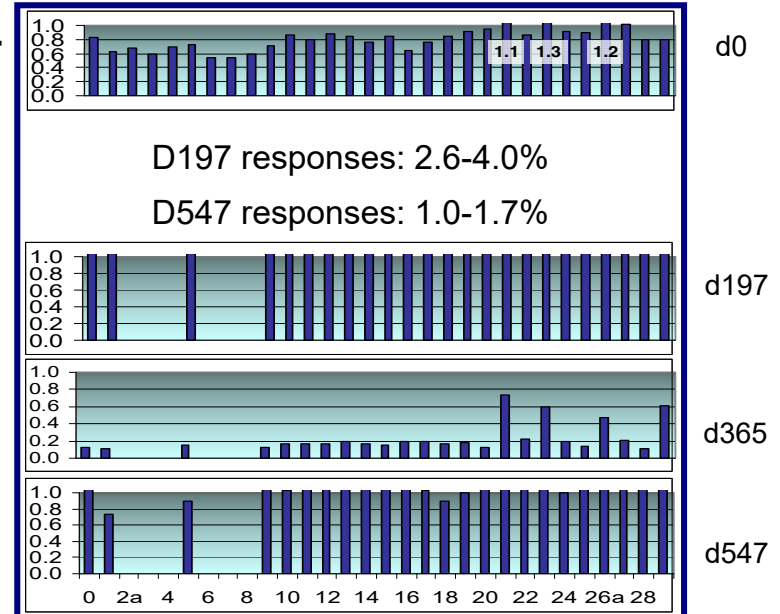

Supplement: jitc-2019-000410supp008.pdf [file jitc-2019-000410supp008.pdf]
