# Supplementary material for: Results of a randomized, double-blind phase II clinical trial of NY-ESO-1 vaccine with ISCOMATRIX adjuvant versus ISCOMATRIX alone in participants with high-risk resected melanoma
Source: PubMed Central journal article supplement — J Immunother Cancer. 2020 Apr 20;8(1):e000410. doi: 10.1136/jitc-2019-000410 (PMC7204806; doi:10.1136/jitc-2019-000410), 2020-04-20
Supplement: jitc-2019-000410supp003.pdf [file jitc-2019-000410supp003.pdf]

**Patient information**

ID: 013-003

Demographics: 41 yo, M

HLA: A1, A32; B7, B8; Cw7, Cw7

Melanoma stage: IIIb; cutaneous

Relapse: No

Completed vaccination: Yes

No. Vaccine doses: 4

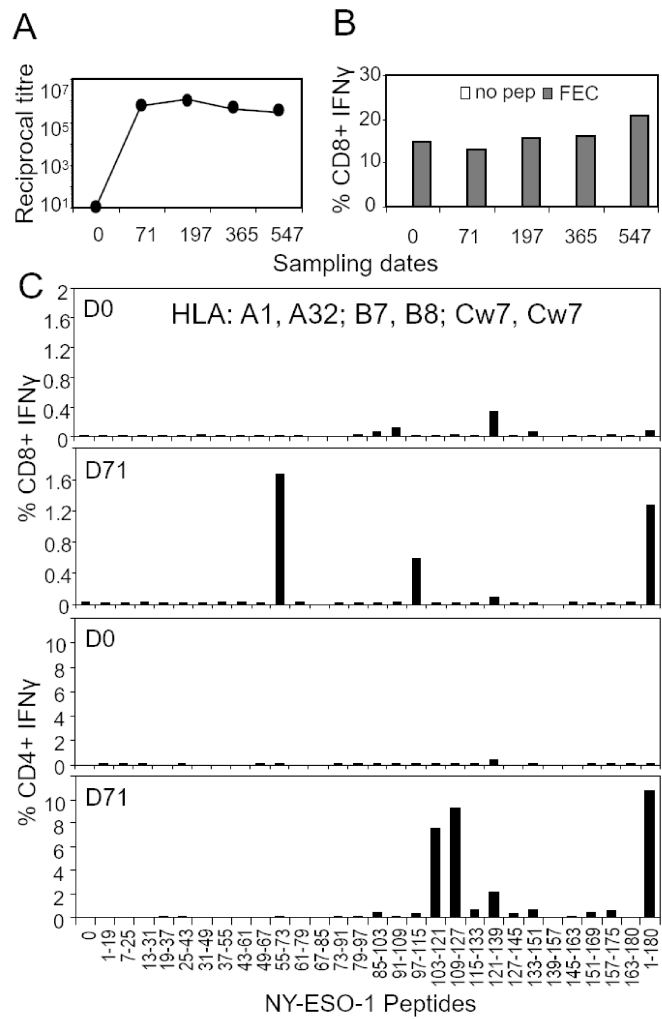

Supplementary Figure S2
