# Supplementary material for: Results of a randomized, double-blind phase II clinical trial of NY-ESO-1 vaccine with ISCOMATRIX adjuvant versus ISCOMATRIX alone in participants with high-risk resected melanoma
Source: PubMed Central journal article supplement — J Immunother Cancer. 2020 Apr 20;8(1):e000410. doi: 10.1136/jitc-2019-000410 (PMC7204806; doi:10.1136/jitc-2019-000410), 2020-04-20
Supplement: jitc-2019-000410supp004.pdf [file jitc-2019-000410supp004.pdf]

**Summary**CD8 response: 24<sup>p</sup>, 27<sup>p</sup>CD4 response: 14<sup>y</sup>, 15<sup>y</sup>, 21<sup>y</sup>, 22<sup>y</sup>, 23<sup>y</sup>, 26<sup>y</sup>; 18<sup>p</sup>, 27<sup>p</sup>

Antibody response: p

**Patient information**

ID: 014-001

Demographics: 29 yo, M

HLA: B44, B8

Melanoma stage: IIIb;

Relapse: No

Completed vaccination: Yes

No. Vaccine doses: 4

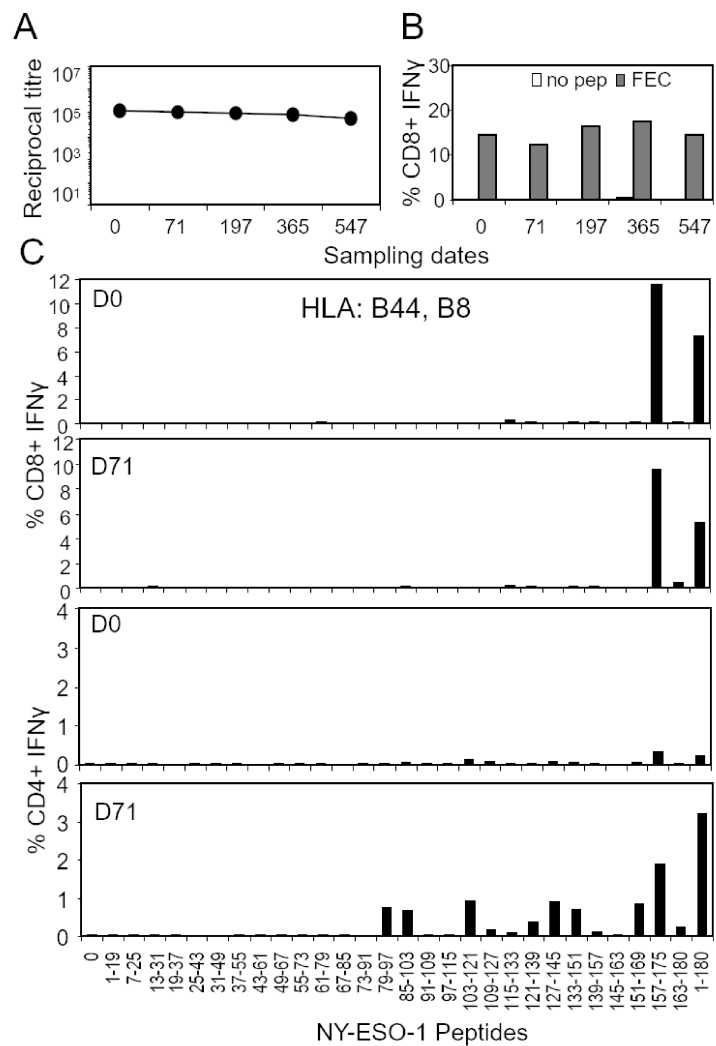**Supplementary Figure S3**
