# Supplementary material for: Results of a randomized, double-blind phase II clinical trial of NY-ESO-1 vaccine with ISCOMATRIX adjuvant versus ISCOMATRIX alone in participants with high-risk resected melanoma
Source: PubMed Central journal article supplement — J Immunother Cancer. 2020 Apr 20;8(1):e000410. doi: 10.1136/jitc-2019-000410 (PMC7204806; doi:10.1136/jitc-2019-000410), 2020-04-20
Supplement: jitc-2019-000410supp005.pdf [file jitc-2019-000410supp005.pdf]

**Summary**

CD8 response: nil

CD4 response: 20<sup>y</sup>, 27<sup>y</sup>; 14<sup>p</sup>, 15<sup>p</sup>, 18<sup>p</sup>, 21<sup>p</sup>

Antibody response: p

**Patient information**

ID: 014-005

Demographics: 28 yo, F

HLA: A2,A26; B7,B44; Cw5, Cw7

Melanoma stage: IV;

Relapse: No

Completed vaccination: Yes

No. Vaccine doses: 4

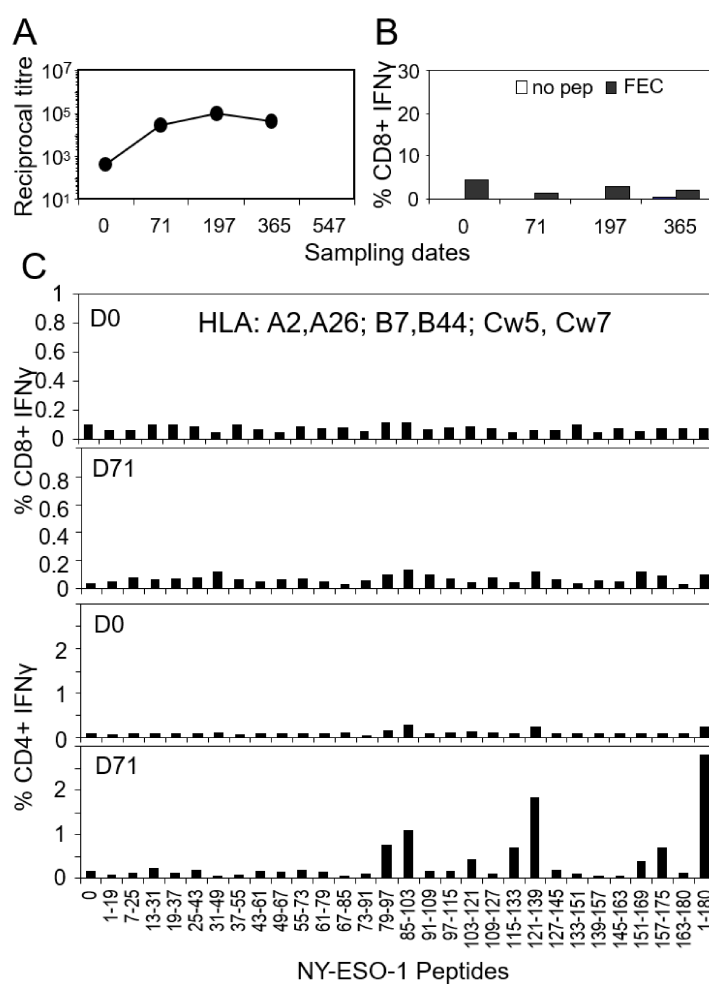

Supplementary Figure S4
