# Supplementary material for: Results of a randomized, double-blind phase II clinical trial of NY-ESO-1 vaccine with ISCOMATRIX adjuvant versus ISCOMATRIX alone in participants with high-risk resected melanoma
Source: PubMed Central journal article supplement — J Immunother Cancer. 2020 Apr 20;8(1):e000410. doi: 10.1136/jitc-2019-000410 (PMC7204806; doi:10.1136/jitc-2019-000410), 2020-04-20
Supplement: jitc-2019-000410supp006.pdf [file jitc-2019-000410supp006.pdf]

**Summary**CD8 response: 10<sup>v</sup>, 15<sup>v</sup>, 16<sup>v</sup>, 21<sup>v</sup>

CD4 response: nil

Antibody response: ND. No pre trial serum

**Patient information**

ID: 063-002

Demographics: 49 yo, F

HLA: A2 Melanoma stage: IIIc

Relapse: No Completed vaccination: Yes

No. Vaccine doses: 4

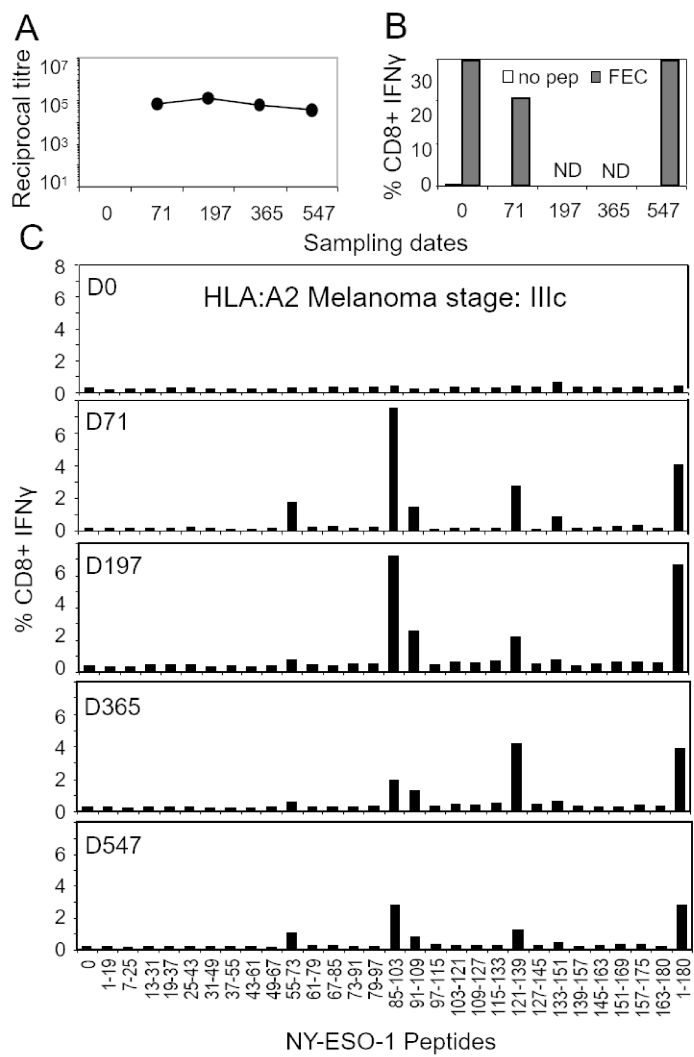

Supplementary Figure S5
