# Supplementary material for: Results of a randomized, double-blind phase II clinical trial of NY-ESO-1 vaccine with ISCOMATRIX adjuvant versus ISCOMATRIX alone in participants with high-risk resected melanoma
Source: PubMed Central journal article supplement — J Immunother Cancer. 2020 Apr 20;8(1):e000410. doi: 10.1136/jitc-2019-000410 (PMC7204806; doi:10.1136/jitc-2019-000410), 2020-04-20
Supplement: jitc-2019-000410supp007.pdf [file jitc-2019-000410supp007.pdf]

**Summary**

CD8 response: nil  
 CD4 response: 14<sup>y</sup>, 15<sup>y</sup>, 16<sup>y</sup>, 20<sup>y</sup>, 22<sup>y</sup>, 23<sup>y</sup> single time points only  
 Antibody response: p

**Patient information**

ID: 014-003  
 Demographics: 61yo, M  
 HLA: A2, A3; B7, B35; Cw4, Cw7  
 Melanoma stage: IV;  
 Relapse: No  
 Completed vaccination: Yes  
 No. Vaccine doses: 4

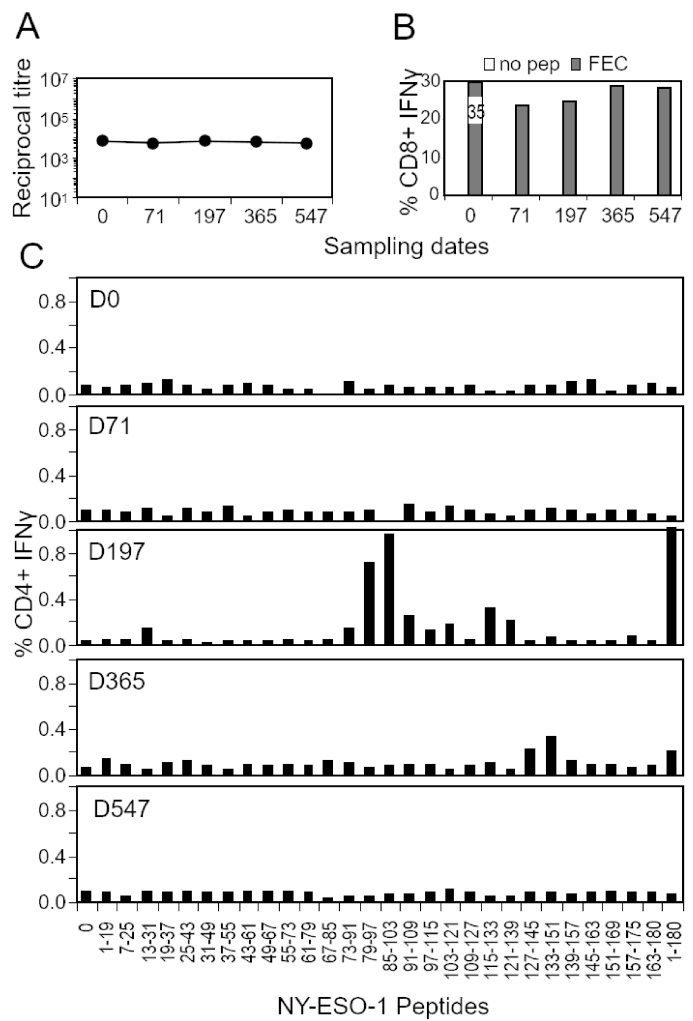

Supplementary Figure S6
