# Supplementary figures and images for: Results of a randomized, double-blind phase II clinical trial of NY-ESO-1 vaccine with ISCOMATRIX adjuvant versus ISCOMATRIX alone in participants with high-risk resected melanoma
Source: PubMed Central journal article supplement — J Immunother Cancer. 2020 Apr 20;8(1):e000410. doi: 10.1136/jitc-2019-000410 (PMC7204806; doi:10.1136/jitc-2019-000410), 2020-04-20

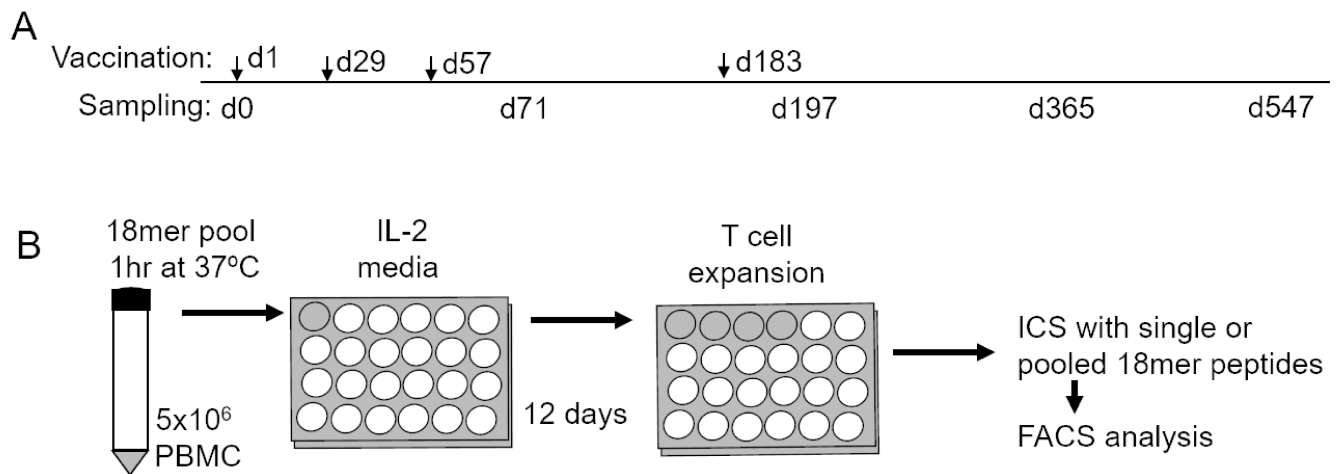

Supplement: jitc-2019-000410supp002.pdf [file jitc-2019-000410supp002.pdf]
